# Supplementary material for: Exploration into lipid management and persistent risk in patients hospitalised for acute coronary syndrome in Japan (EXPLORE-J): protocol for a prospective observational study
Source: PubMed Central journal article supplement — BMJ Open. 2017 Jul 2;7(6):e014427. doi: 10.1136/bmjopen-2016-014427 (PMC5734360; doi:10.1136/bmjopen-2016-014427), 2017-07-02
Supplement: bmjopen-2016-014427.draft_revisions.pdf [file bmjopen-2016-014427.draft_revisions.pdf]

# BMJ Open

## Exploration into lipid management and persistent risk in patients hospitalised for acute coronary syndrome in Japan (EXPLORE-J): Rationale and design for a prospective observational study

|                                 |                                                                                                                                 |
|---------------------------------|---------------------------------------------------------------------------------------------------------------------------------|
| Journal:                        | <i>BMJ Open</i>                                                                                                                 |
| Manuscript ID                   | bmjopen-2016-014427                                                                                                             |
| Article Type:                   | Protocol                                                                                                                        |
| Date Submitted by the Author:   | 05-Oct-2016                                                                                                                     |
| Complete List of Authors:       | Nakamura, Masato<br>Uno, Kiyoko<br>Hirayama, Atsushi<br>Ako, Junya<br>Nohara, Atsushi<br>Arai, Hidenori<br>Harada-Shiba, Mariko |
| <b>Primary Subject Heading</b>: | Cardiovascular medicine                                                                                                         |
| Secondary Subject Heading:      | Cardiovascular medicine                                                                                                         |
| Keywords:                       | acute coronary syndrome, familial hypercholesterolaemia, Japan, lipid management, proprotein convertase subtilisin kexin 9      |
|                                 |                                                                                                                                 |

SCHOLARONE™  
Manuscripts

Only

1  
2  
3 **Exploration into lipid management and persistent risk in patients hospitalised for acute**  
4 **coronary syndrome in Japan (EXPLORE-J): Rationale and design for a prospective**  
5 **observational study**  
6  
7  
8  
9

10  
11  
12 Masato Nakamura<sup>1</sup>, Kiyoko Uno<sup>2</sup>, Atsushi Hirayama<sup>3</sup>, Junya Ako<sup>4</sup>, Atsushi Nohara<sup>5</sup>, Hidenori  
13 Arai<sup>6</sup>, and Mariko Harada-Shiba<sup>7</sup>  
14  
15  
16  
17  
18  
19

20 1) Division of Cardiovascular Medicine, Toho University Ohashi Medical Center, Tokyo, Japan;  
21  
22 2) Sanofi, Tokyo, Japan; 3) Division of Cardiology, Nihon University School of Medicine,  
23  
24 Tokyo, Japan; 4) Department of Cardiovascular Medicine, Kitasato University, Kanagawa,  
25  
26 Japan; 5) Department of Lipidology, Kanazawa University of Graduate School of Medical  
27  
28 Sciences, Kanazawa, Japan; 6) National Center for Geriatrics and Gerontology, Aichi, Japan; 7)  
29  
30 Department of Molecular Innovation in Lipidology, National Cerebral & Cardiovascular Center  
31  
32 Research Institute, Osaka, Japan  
33  
34  
35  
36  
37  
38

39 **Corresponding author:**

40  
41 Masato Nakamura, MD

42  
43 Professor, Division of Cardiovascular Medicine

44  
45 Toho University Ohashi Medical Center

46  
47 2-17-6 Ohashi, Meguro-ku, Tokyo 153-8515, Japan

48  
49 Tel: +81-3-3468-1251

50  
51 Fax: +81-3-3468-1269

52  
53 E-mail: masato@oha.toho-u.ac.jp  
54  
55  
56  
57  
58  
59  
60

1  
2  
3  
4  
5 **Key words:** acute coronary syndrome, familial hypercholesterolaemia, Japan, lipid management,  
6  
7  
8 proprotein convertase subtilisin kexin 9  
9  
10  
11  
12  
13  
14  
15  
16  
17  
18  
19  
20  
21  
22  
23  
24  
25  
26  
27  
28  
29  
30  
31  
32  
33  
34  
35  
36  
37  
38  
39  
40  
41  
42  
43  
44  
45  
46  
47  
48  
49  
50  
51  
52  
53  
54  
55  
56  
57  
58  
59  
60

For peer review only

## Abstract

**Introduction** The present study is the largest registry study ever conducted in Japan exploring the prevalence of familial hypercholesterolaemia (FH) among acute coronary syndrome (ACS) patients. Our study aims to (1) evaluate the status of lipid management and the subsequent risk of major cardiovascular events following hospitalisation of Japanese ACS patients in real-world clinical practice; (2) determine the proportion of Japanese ACS patients who achieve the lipid management goal and have a reduction of event risks with strict lipid management (low-density lipoprotein-cholesterol <1.81 mmol/L); (3) determine the prevalence of FH; and (4) investigate the clinical significance of proprotein convertase subtilisin kexin 9 (PCSK9) level.

**Methods and analysis** We will conduct a multicentre, prospective, observational study of approximately 2,000 Japanese ACS patients with/without FH hospitalised between April 2015 and August 2016. The primary endpoint is the incidence of major adverse cardiovascular events (MACEs) after initial hospitalisation. The secondary endpoints are (1) MACE developed from Visit 1 to Visit 2 (Day 30); (2) MACE developed from Visit 2 (Day 30) to Visit 5 (Day 730); (3) treatment rate by lipid-lowering therapies (any statin or intensive, PCSK9 inhibitor, fibrates, and ezetimibe); (4) incidence of events by the addition of the following outcomes to the primary endpoint: coronary revascularisation due to myocardial ischaemia, revascularisation other than coronary artery, inpatient treatment for occurrence or exacerbation of heart failure, transient ischaemic attack, acute arterial occlusion, central retinal artery occlusion, and other adverse events prolonging or requiring hospitalisation; and (5) proportion of subjects achieving target lipid levels.

**Ethics and dissemination** The study protocol was submitted to the ethical review committee of each participating centre for approval. Participation in the study is voluntary and anonymous.

1  
2  
3 The study findings will be disseminated in international peer-reviewed journals and presented at  
4  
5 relevant conferences.  
6  
7

8  
9 **Clinical trial registration:** UMIN000018946  
10  
11  
12  
13  
14  
15  
16  
17  
18  
19  
20  
21  
22  
23  
24  
25  
26  
27  
28  
29  
30  
31  
32  
33  
34  
35  
36  
37  
38  
39  
40  
41  
42  
43  
44  
45  
46  
47  
48  
49  
50  
51  
52  
53  
54  
55  
56  
57  
58  
59  
60

For peer review only

### Strengths and limitations of this study

- This study will provide new insights into the relationship between acute coronary syndrome (ACS) and recurrent events and the relationship between recurrent events and serum low-density lipoprotein-cholesterol levels in Japanese ACS patients.
- This study will be the first to evaluate the familial hypercholesterolaemia (FH) to ACS ratio and will provide important information regarding PCSK9 concentrations, including (1) the dynamic change of PCSK9 concentrations during post-ACS medical management, (2) the relationship between PCSK9 concentrations and cardiovascular events, (3) the difference of PCSK9 concentrations between FH and non-FH, and (4) the relationship among PCSK9 concentrations, lipid parameters and lipid lowering therapies for both statin-naïve and statin-exposed patients.
- This study will be a prospective, large-scale, observational study of approximately 2,000 Japanese ACS patients from 59 participating centres.
- This study is the largest FH registry study in Japan targeting the high-risk population.
- This study will be limited by the inherent limitations of the observational study design (e.g., susceptibility to biases and confounders, and the inability to establish causality) and the small sample size; the generalisability of our findings will be limited to the Japanese population.

## INTRODUCTION

The incidence of atherosclerotic disease, including heart disease, in Japan is increasing and is associated with a change towards a Western lifestyle and increase in dyslipidaemia.[1] There is a positive correlation between low-density lipoprotein-cholesterol (LDL-C) levels and the incidence of coronary artery disease.[2, 3] Therapy to lower LDL-C helps prevent cardiovascular events. Large statin trials have demonstrated the benefits of achieving an LDL-C level of 1.42–2.02 mmol/L, which has served as a basis for more aggressive European and US guidelines [4]. In particular, aggressive therapy to achieve LDL-C <1.81 mmol/L, the target value for lipid management (in patients for whom aggressive therapy is intended) in European and US guidelines,[5, 6] or the use of high-intensity statins according to American College of Cardiology/American Heart Association guidelines have helped to reduce cardiovascular events and the progression of atherosclerosis.[5-10]

However, the Japanese guidelines for the prevention of atherosclerosis published in 2012 set higher target values for LDL-C management at <3.11 mmol/L in primary prevention for high-risk patients and <2.59 mmol/L for secondary prevention because the evidence for benefit was suggested to be insufficient.[11] Previous Japanese studies (ESTABLISH and the follow-up Extended-ESTABLISH study) reported that aggressive LDL-C lowering reduced the incidence of death, the recurrence of acute coronary syndrome (ACS), and cerebral infarction compared with a control group.[12, 13] The MEGA study showed the benefit of lipid-lowering therapy in Japanese patients, but to values higher than 2.59 mmol/L.[14] While a number of imaging studies with intravascular ultrasound and other modalities have shown the benefits of aggressive LDL-C-lowering therapy in Japanese patients in terms of reduced plaque volume or coronary plaque regression,[15-19] there is no large-scale clinical study that shows the need for aggressive

1  
2  
3 lipid-lowering therapy in Japan, especially to LDL-C target values lower than 2.59 mmol/L. It is  
4  
5 generally accepted that insufficient evidence is available to determine the benefit of such therapy.  
6  
7 Therefore, investigations into this issue, and evaluation of a possible relationship between LDL-  
8  
9 C and recurrent coronary events and coronary artery disease progression in Japan are needed.  
10  
11

12  
13 Familial hypercholesterolaemia (FH) is an inherited, autosomal dominant disease resulting  
14  
15 from abnormalities in the genes coding for the LDL receptor and related molecules. It is  
16  
17 characterised by three major signs: (i) hyper-LDL-cholesterolaemia; (ii) early onset coronary  
18  
19 artery diseases; and (iii) tendon/skin xanthoma. Untreated FH carries an extremely high risk of  
20  
21 developing coronary artery diseases, particularly in men aged between 30 and 50 years and  
22  
23 women aged between 40 and 70 years.[20, 21] Risk data from the Simon Broome study in 1991  
24  
25 showed that the risk of cardiovascular death was 99 times higher in patients with FH at ages 20–  
26  
27 39 years.[22] Although heterozygous FH is present in an estimated 300,000 patients in  
28  
29 Japan,[23] the diagnosis rate is only <1% of the estimated number of patients with FH in  
30  
31 Japan.[21] According to an investigation by the Ministry of Health, Labour and Welfare in  
32  
33 Japan,[20] the prevalence of FH is 4%–19% of patients presenting with ACS. FH may be under-  
34  
35 diagnosed because of a masking affect by statin therapy, or the transient reduction of LDL-C  
36  
37 associated with acute myocardial infarction (Figure 1). A prospective cohort observational study  
38  
39 of 4,534 patients with ACS in Switzerland reported an FH prevalence of 1.6%–5.5%, and a  
40  
41 higher adjusted risk of coronary death or myocardial infarction among patients with FH than  
42  
43 without (hazard ratio, 2.46–3.53 after 1 year).[24] To date there have been no reports regarding  
44  
45 the ACS recurrence rate in patients with FH in Japan. Therefore, it is important to clarify the  
46  
47 prevalence of FH in patients with ACS, the recurrence rate of coronary artery disease in patients  
48  
49  
50  
51  
52  
53  
54  
55  
56  
57  
58  
59  
60



1  
2  
3 with FH, and risk factors for recurrence to provide the optimal treatment for Japanese patients  
4  
5 with FH.  
6  
7

8  
9 Proprotein convertase subtilisin kexin 9 (PCSK9) is a protein that binds to LDL receptors to  
10 induce their degradation in intracellular lysosomes and inhibit their recycling.[25] Interestingly,  
11 patients with loss-of-function mutations in the *PCSK9* gene have low LDL-C levels and rarely  
12 develop cardiovascular diseases compared with normal individuals. PCSK9 inhibitors are an  
13 effective lipid-lowering therapy. PCSK9 and LDL-C levels show a positive correlation in  
14 patients not treated with a lipid-lowering therapy, but this relationship disappears when lipid-  
15 lowering therapies, particularly oral statins, are administered.[26,27] Statins may simultaneously  
16 increase the concentration of PCSK9 and the expression of LDL receptors, while lowering LDL-  
17 C.[26] However, despite our current knowledge of PCSK9, its clinical significance in ACS  
18 patients remains unclear. The ODYSSEY Outcomes trial [28] will be the largest outcomes trial  
19 examining the effect of PCSK9 inhibition on reducing cardiovascular morbidity and mortality in  
20 ACS patients; however, until these results become available, the EXPLORE-J trial will reveal  
21 important insights into this issue.  
22  
23  
24  
25  
26  
27  
28  
29  
30  
31  
32  
33  
34  
35  
36  
37  
38

39  
40 Considering the above-mentioned gaps in the literature, the primary objective of this study is  
41 to evaluate the status of lipid management and risk of major cardiovascular events in Japanese  
42 ACS patients in real-world clinical practice. Secondary study objectives are to identify the  
43 proportion of ACS patients in Japan who (i) achieve the target value of lipid management (LDL-  
44 C  $\leq$  2.59 mmol/L); (ii) have a reduction of event risks with strict lipid management (LDL-C  
45 < 1.81 mmol/L); and (iii) who have FH and are hospitalised for treatment of ACS. The risk of  
46 recurrent ACS in patients with FH compared with patients without FH will be determined using  
47 the diagnostic criteria for FH as shown in **Table 1**. Other objectives are to investigate the clinical  
48  
49  
50  
51  
52  
53  
54  
55  
56  
57  
58  
59  
60

significance of PCSK9 concentrations by observing the time-course profile of PCSK9 concentrations in patients presenting with ACS and analysing the relationship between the concentration of PCSK9 and FH, lipid-lowering therapy, and lipid management levels.

**Table 1<sup>a</sup>** Diagnostic criteria for heterozygous FH in adults (aged 15 years and older)

|                                                                                                                             |
|-----------------------------------------------------------------------------------------------------------------------------|
| Hyper LDL cholesterolaemia (LDL-C $\geq$ 180 mg/dL before treatment)                                                        |
| Tendon xanthoma (tendon xanthoma in the back of hand, elbow, knee, etc. or Achilles tendon thickening) or tuberous xanthoma |
| Family history (blood relatives within the second degree of kinship) of FH or early onset coronary artery disease           |

#### Notes

- *Diagnosis is established excluding secondary hyperlipidaemia.*
- *FH is diagnosed when two or more items are met. Diagnosis by genetic examination is advised if FH is suspected.*
- *Tuberous xanthoma does not include xanthelasma of the eyelid.*
- *Achilles tendon thickening is diagnosed by a thickness of  $\geq$ 9 mm on radiogram.*
- *FH is strongly suspected if LDL-C is  $\geq$ 250 mg/dL.*
- *If the patient is already on drug therapy, refer to the lipid level that triggered the treatment.*
- *Early onset coronary artery diseases are defined as those in which onset occurs at <55 years of age in men and <65 years of age in women.*

<sup>a</sup>Reproduced with modifications Harada-Shiba et al.[20] with permission from the *Journal of Atherosclerosis and Thrombosis*.

FH, familial hypercholesterolaemia; LDL, low-density lipoprotein.

## METHODS AND ANALYSIS

### Study design

This will be a multicentre, prospective, observational study of Japanese patients presenting with ACS. Sixty-five sites are planned to participate in this study (see **Appendix**). These sites were chosen based on their ability to provide the most advanced percutaneous coronary intervention in Japan for patients presenting with ACS. Consecutive patients requiring hospitalisation for ACS were registered in 59 sites, for a total of 2,016 patients, between April 2015 and August 2016.

After the patients provided written informed consent within 7 days after hospitalisation for ACS, the investigator at each study centre successively registered subjects who met the inclusion criteria. Successive registration of patients limits the selection bias by the investigator. The schedule for initial and follow-up examinations and the data to be collected are shown in **Figure 2** and **Table 2**.

**Table 2** Observations and endpoints

| Category                                           | Method and materials              | Observation and examination items                                                                              |
|----------------------------------------------------|-----------------------------------|----------------------------------------------------------------------------------------------------------------|
| Demographic characteristics (subjects' background) | Interview                         | Age, sex, and smoking and drinking status                                                                      |
| ACS                                                | Medical examination and interview | Onset date of ACS, date of hospitalisation, disease type, description of treatment                             |
| History of present illness/previous                | Interview                         | Particular previous history of cardiovascular diseases and cardiovascular risk-related diseases and history of |

| Category                                    | Method and materials | Observation and examination items                                                                                                                                                                                                                                                                                                  |
|---------------------------------------------|----------------------|------------------------------------------------------------------------------------------------------------------------------------------------------------------------------------------------------------------------------------------------------------------------------------------------------------------------------------|
| history/therapies                           |                      | their treatments (immediately before hospitalisation and at each visit).                                                                                                                                                                                                                                                           |
| Physical findings                           | Medical examination  | Body height, body weight, and presence or absence of xanthoma                                                                                                                                                                                                                                                                      |
| Reference LDL-C value                       | Interview            | Value before treatment such as that obtained at a health examination                                                                                                                                                                                                                                                               |
| Family history                              | Interview            | Coronary artery diseases, ischaemic cerebral infarction, and hypercholesterolaemia in relatives to the second degree of kinship.                                                                                                                                                                                                   |
| Primary endpoints                           | Interview            | Investigation of outcome (alive or dead), date of death, cause of death, and presence or absence of non-fatal ACS and non-fatal cerebrovascular diseases requiring in-hospital treatments                                                                                                                                          |
| Secondary endpoints                         | Interview            | Presence or absence of event                                                                                                                                                                                                                                                                                                       |
| Haematological and biochemical examinations | Serum                | <p>The following parameters will be measured from blood obtained in the sitting position when the symptoms are stable:</p> <p>Total cholesterol, HDL cholesterol, LDL cholesterol (automatic calculation), triglycerides, apoA1, apoB, Lp(a), creatinine, blood glucose, HbA<sub>1c</sub>, hsCRP, haemoglobin, and haematocrit</p> |

| Category                           | Method and materials | Observation and examination items                                                                                                                                                  |
|------------------------------------|----------------------|------------------------------------------------------------------------------------------------------------------------------------------------------------------------------------|
| PCSK9                              | Serum                | Collective measurement at the central laboratory                                                                                                                                   |
| FH gene examination                | Whole blood          | Collective measurement at the central laboratory                                                                                                                                   |
| Radiography of the Achilles tendon | Radiography          | Whenever possible, radiography of the Achilles tendon will be performed during index hospitalisation for registration, but radiography obtained by Visit 3 will also be acceptable |

ACS, acute coronary syndrome; LDL-C, low-density lipoprotein cholesterol; PCSK9, proprotein convertase subtilisin kexin 9; apo, apolipoprotein; HDL, high-density lipoprotein; HbA<sub>1c</sub> glycosylated haemoglobin; hsCRP, high sensitivity C-reactive protein; Lp(a), lipoprotein A; FH, familial hypercholesterolaemia.

Data are collected at Visit 1 (within 14 days after hospitalisation due to ACS), and Visits 2 to 5 during the 2-year observational period on Days 30 ( $\pm 7$  days), 180 ( $\pm 30$  days), 365 ( $\pm 30$  days), and 730 ( $\pm 30$  days). Data are collected using an electronic case report form. The information collected at each visit is shown in **Table 2**. During the 2-year observation period (Visits 2–5), if a subject is transferred to another hospital during this time, the institution will be asked to provide the following information for the follow-up: attendance/non-attendance; date of observation; primary endpoints (investigation of outcome [alive/dead]); secondary endpoints (presence or absence); physical examination; fasting haematological and biochemical examinations, including PCSK9 concentrations (Visits 2–4); and medications.

The samples collected in this study will be sent to a central laboratory (BML General Laboratory BML, INC., Saitama, Japan) under freezing conditions ( $-20^{\circ}\text{C}$ ) until completion of

1  
2  
3 the study so that re-examination can be performed. All samples will be discarded after  
4  
5 completion of the study.  
6  
7  
8  
9

## 10 11 **Study subjects**

12  
13  
14 The study subjects are Japanese patients presenting with ACS, hospitalised between April 2015  
15  
16 and August 2016. In total, 2,016 subjects were registered.  
17  
18

19  
20 The key inclusion criteria are as follows: age  $\geq 20$  years; hospitalisation for any ACS  
21  
22 including ST-segment elevation myocardial infarction (STEMI), non ST-segment elevation  
23  
24 myocardial infarction (NSTEMI), and unstable angina; and ability to obtain written informed  
25  
26 consent. STEMI is defined as the presence of chest symptoms such as pain or breathlessness  
27  
28 suspected to be caused by myocardial ischaemia, persisting for  $\geq 20$  min; ST elevation of  $\geq 1$  mm  
29  
30 on  $\geq 2$  contiguous leads or new left bundle branch block; and elevated troponin T  $\geq 0.1$   $\mu\text{g/L}$  or  
31  
32 creatine phosphokinase-MB two times above the upper limit of normal. Acute NSTEMI is  
33  
34 defined as the presence of chest symptoms such as pain or breathlessness suspected to be caused  
35  
36 by myocardial ischaemia, persisting for  $\geq 20$  min  $\leq 24$  h before admission; not having ST-segment  
37  
38 elevation  $\geq 1$  mm or new left bundle branch block; and the presence of elevated troponin T  $\geq 1.0$   
39  
40  $\mu\text{g/L}$  or creatine phosphokinase-MB two times above the upper limit of normal. Unstable angina  
41  
42 is defined as the presence of resting or nocturnal chest pain that may be persistent ( $\geq 20$  min) and  
43  
44 at least one of the following: ST depression  $\geq 0.5$  mm or T wave inversion  $\geq 3$  mm; troponin T  
45  
46  $\geq 0.014$   $\mu\text{g/L}$  or  $< 1.0$   $\mu\text{g/L}$ ; confirmation of significant stenosis by diagnostic imaging; new  
47  
48 decrease in wall motion detected by echocardiography; or reversible myocardial perfusion defect  
49  
50 detected by myocardial perfusion imaging.  
51  
52  
53  
54  
55  
56  
57  
58  
59  
60

1  
2  
3 The key exclusion criteria are as follows: patients with chest pain and coronary artery  
4 diseases presenting with concomitant serious diseases, patients with in-stent thrombosis, patients  
5 enrolled in other interventional studies that could affect lipid profile, and those judged as  
6 inappropriate by the investigators or subinvestigators.  
7  
8  
9  
10  
11

### 12 13 14 15 16 **Primary endpoint**

17  
18 The primary endpoint is the incidence of major adverse cardiovascular events (MACE), defined  
19 as death associated with myocardial infarction or other cardiovascular death, major non-fatal  
20 coronary event (myocardial infarction or hospitalisation for unstable angina), or ischaemic  
21 stroke. Incidences are monitored independently by the investigator at each local site. A time  
22 window will be allowed for observations at Visit 2 ( $\pm 7$  days) and Visits 3–5 ( $\pm 30$  days).  
23  
24  
25  
26  
27  
28  
29  
30

31 Deaths associated with myocardial infarction or other cardiovascular deaths are defined as  
32 death secondary to acute myocardial infarction or any death with a clear relationship to  
33 underlying coronary heart disease, sudden death, heart failure, complication of coronary  
34 revascularisation procedure where the cause of death is clearly related to the procedure,  
35 unobserved or unexpected death, or other death that cannot be definitively attributed to a non-  
36 cardiovascular cause. Non-fatal myocardial infarction is defined in accordance with the  
37 ACC/AHA/ESC Universal Definition of Myocardial Infarction.[29]  
38  
39  
40  
41  
42  
43  
44  
45  
46  
47

48 Ischaemic stroke is characterised by an acute episode of focal cerebral, spinal, or retinal  
49 dysfunction caused by infarction, defined by at least one of the following: pathological, imaging,  
50 or other objective evidence of acute, focal cerebral, spinal, or retinal ischaemic injury in a  
51  
52  
53  
54  
55  
56  
57  
58  
59  
60

1  
2  
3 defined vascular distribution; symptoms of acute cerebral, spinal, or retinal ischaemic injury  
4  
5 persisting for  $\geq 24$  hours or until death, with other aetiologies excluded.  
6  
7  
8  
9

### 11 **Secondary endpoints**

14 The secondary endpoints are MACE developed from Visit 1 to Visit 2 (Day 30); MACE  
15 developed from Visit 2 (Day 30) to Visit 5 (Day 730); treatment rate by the following lipid-  
16 lowering therapies: any statin, intensive statin (e.g., atorvastatin  $\geq 20$  mg, rosuvastatin  $\geq 10$  mg,  
17 and pitavastatin  $\geq 4$  mg), PCSK9 inhibitor, and other lipid-lowering therapies such as fibrates and  
18 ezetimibe; incidence of events by the addition of the following outcomes to the primary  
19 endpoints: coronary revascularisation due to myocardial ischaemia, revascularisation other than  
20 in the heart, inpatient treatment for occurrence or exacerbation of heart failure, transient  
21 ischaemic attack, acute arterial occlusion, central retinal artery occlusion, and other adverse  
22 events prolonging or requiring hospitalisation; and proportion of subjects achieving target lipid  
23 levels per study visit. The treatment rate will be determined based on written prescriptions. Other  
24 endpoints include the prevalence rates of FH in patients with ACS, comparison of PCSK9  
25 concentration between patients with or without FH, and comparison between clinical diagnosis  
26 of FH based on the guidelines vs. genetic analysis.  
27  
28  
29  
30  
31  
32  
33  
34  
35  
36  
37  
38  
39  
40  
41  
42  
43  
44  
45  
46  
47

### 48 **Discontinuation from study**

51 The criteria used to allow discontinuation from the study include the withdrawal of consent by  
52 the subject or his/her legal representative, patient ineligibility (violation of the study contract),  
53 death of a subject, or removal by the judgement of the investigator or subinvestigators.  
54  
55  
56  
57  
58  
59  
60



## Safety protocol

Because this is an observational study (i.e., non-interventional) there will be no adverse events caused by a study drug. Patients will receive drugs as normally prescribed in daily medical practice.

Serious adverse drug reactions caused by a drug will be the subject for application of relief under the Relief System for Sufferers from Adverse Drug Reactions similar to that in daily medical practice. Treatments for other adverse drug reactions will be covered by the national insurance scheme.

## Statistical analyses

The sample size was calculated to assess the persistent cardiovascular risk (defined as MACE) from the index event to 2 years. Based on the PACIFIC registry, in which the incidence of MACE was 6.4% at 2 years, a sample size of 2,000 has a precision of  $\pm 1\%$  in the incidence of MACE with a 95% confidence interval (CI) of 0.053–0.074.[30] With this sample size, the subgroup analysis (the comparison of MACE in patients with LDL-C  $< 1.81$  mmol/L and  $\geq 1.81$  mmol/L) will be performed. Because 409 of 1827 (22.3%) Japanese ACS patients in the PACIFIC study and 305 of 1145 (26.6%) Japanese ACS patients in an ongoing database study reached an LDL-C level  $< 1.81$  mmol/L, we expect to have 446–532 patients with an LDL-C level  $< 1.81$  mmol/L in this registry. All patients meeting the inclusion criteria will be analysed. The demographic data will be presented as the mean, median, standard deviation, and range for continuous data, and number and proportion of subjects in each category for categorical data.

1  
2  
3 The analysis of the primary endpoint will be as follows: for the incidence of MACE at 2  
4 years, Kaplan–Meier analysis will be used to estimate the event observed first after registration  
5 in the whole population. The Greenwood formula will determine the 95% CI.  
6  
7  
8  
9

10 Subgroup analysis will investigate the association of factors with the incidence of MACE,  
11 LDL-C <1.81 mmol/L vs  $\geq$ 1.81 mmol/L at registration, and the presence or absence of FH. The  
12 Cox proportional hazard model and subgroup analysis will compare demographic factors (age,  
13 sex, smoking history, body mass index, and underlying diseases) using a two-sided significance  
14 level of 5% (not considering multiplicity, as the study is exploratory). Subgroup analysis will be  
15 performed for LDL-C (<1.81 mmol/L or  $\geq$ 1.81 mmol/L) at the time when the event has occurred.  
16  
17  
18  
19  
20  
21  
22  
23  
24

25 Analysis of the secondary endpoints (MACE developed by Visit 2 [Day 30]; MACE  
26 developed between Visit 2 [Day 30] and Visit 5 [Day 730]; and treatment rate by lipid-lowering  
27 therapy) will be assessed by determining the ratio of subjects on each lipid-lowering therapy  
28 administered during observation and the 95% CI using the full analysis set. The incidences of  
29 events at Visit 2 and between Visits 2–5 or from the time of registration to the first event, and the  
30 associations of factors with each event will be determined by the same procedures as for the  
31 primary endpoints. For the other endpoints, the prevalence rate of FH in patients with ACS will  
32 be assessed and its 95% CI from the diagnosis of FH will be determined. Logistic regression  
33 analysis and subgroup analysis of the background factors that are associated with the prevalence  
34 of FH for exploratory investigation will be determined. The summary statistics for the  
35 concentration of PCSK9 at each measurement point will be calculated and a trend diagram  
36 (individual and mean/standard deviation) will be developed. In addition, the presence or absence  
37 of the influence of FH by subgroup analysis will be determined.  
38  
39  
40  
41  
42  
43  
44  
45  
46  
47  
48  
49  
50  
51  
52  
53  
54  
55  
56  
57  
58  
59  
60

1  
2  
3 In the survival analysis, missing values will be censored while continuous data and discrete  
4 data will be analysed on the basis of measured values without performing any special processing.  
5  
6 Furthermore, we will also perform a sensitivity analysis where continuous data are handled using  
7  
8 the last observation carried forward imputation, and discrete data are included only in the  
9  
10 denominator but not in the numerator. No special processing will be performed for outliers. For  
11  
12 the statistical analysis, SAS version 9.4 software (SAS Institute Inc., NC, USA) will be used.  
13  
14  
15  
16  
17  
18  
19  
20

### 21 **Quality assurance measures**

22  
23 The study investigators will ensure compliance to the study protocol. Any change in factors that  
24 affect the safety of subjects or the scientific quality of this study (study design, endpoints,  
25  
26 number of patients, and criteria for registration) will require a revision of the protocol, which  
27  
28 must be approved in advance by the ethical review committee. The study records will be stored  
29  
30 and information made available to auditors, ethical review committees, or regulatory authorities  
31  
32 on request.  
33  
34  
35  
36  
37  
38  
39  
40

### 41 **ETHICS AND DISSEMINATION**

42  
43 This study is conducted in compliance with the Declaration of Helsinki (amended in October  
44  
45 2013) and the Ethical Guidelines for Medical and Health Research Involving Human Subjects  
46  
47 (enacted on December 22, 2014). Prior to the study initiation, the investigator or subinvestigators  
48  
49 submitted the protocol and informed consent form to the ethical review committee of each study  
50  
51 centre and obtained their approval. Patient anonymity will be protected by the use of subject  
52  
53 identification codes. A cooperation fee of 5,000 Japanese yen (about \$42 or €37 at Oct 2015) for  
54  
55  
56  
57  
58  
59  
60

1  
2  
3 study participation will be provided for each patient upon request from the study centre. All  
4  
5 patients were required to provide written informed consent.  
6  
7

8  
9 The results of this study will be presented at major cardiovascular-related congresses. The data  
10  
11 regarding FH will be presented at atherosclerotic-related congresses.  
12  
13

## 14 15 16 17 **CONCLUSION**

18  
19 The EXPLORE-J study will provide new insights into the relationship between ACS and  
20  
21 recurrent events, the relationship between recurrent events and serum LDL-C levels, the FH to  
22  
23 ACS ratio, and the PCSK9 concentration in ACS patients in a Japanese population. As a large-  
24  
25 scale study including 2,016 patients from 59 centres, this study will be the first ACS registry to  
26  
27 seek insight into FH in Japan to target the high-risk population.  
28  
29  
30  
31  
32  
33  
34

## 35 **Acknowledgements**

36  
37 The authors thank Marion Barnett, J. Ludovic Croxford, PhD, and Michelle Belanger, MD, of  
38  
39 Edanz Group for providing medical writing support; Tamio Teramoto of Teikyo University  
40  
41 (Tokyo, Japan), Shun Ishibashi of Jichi Medical University (Tochigi, Japan), Kotaro Yokote of  
42  
43 Chiba University (Chiba, Japan), Tomonori Okamura of Keio University (Tokyo, Japan), and  
44  
45 Hiroyuki Daida of Juntendo University (Tokyo, Japan) for collaboration and advice regarding  
46  
47 planning of the study; Yosuke Ujike and Yasuyoshi Nakahigashi, of Sanofi (Tokyo, Japan) for  
48  
49 providing writing and editing support; Mebix, Inc. (Tokyo, Japan) for assistance with study  
50  
51 implementation/operation; BML, Inc. (Tokyo, Japan) for PCSK9- and genome-related analysis;  
52  
53  
54  
55  
56  
57 CTD, Inc. (Tokyo, Japan) for consulting; and Shizuya Yamamashita of Rinku General Medical  
58  
59  
60

1  
2  
3 Center (Osaka, Japan), Toru Yoshizumi of Kawasaki Hospital (Hyogo, Japan), Micron, Inc.  
4  
5  
6 (Tokyo, Japan) for radiography of the Achilles tendon.  
7  
8  
9

### 10 11 **Competing interests**

12  
13  
14 Kiyoko Uno is an employee of Sanofi. Masato Nakamura, Atsushi Hirayama, Junya Ako, Atsushi  
15  
16 Nohara, Hidenori Arai, and Mariko Harada-Shiba have received consultation fees from Sanofi.  
17  
18  
19

### 20 21 **Funding**

22  
23  
24  
25 This work was supported by Sanofi and Regeneron Pharmaceuticals, Inc.  
26  
27  
28  
29

### 30 31 **Authors' contributions**

32  
33  
34 M Nakamura, K Uno, A Hirayama, J Ako, A Nohara, H Arai, and M Harada-Shiba all served on  
35  
36 the steering committee as principal investigators and equally contributed to conception and  
37  
38 design of the study, protocol development, acquisition of data, analysis and interpretation of the  
39  
40 data, and drafting and revising the publication for important intellectual content. M Nakamura, K  
41  
42 Uno, A Hirayama, J Ako, A Nohara, H Arai, and M Harada-Shiba all approved the final version  
43  
44 of the manuscript and have agreed to be accountable for all aspects of the work in ensuring that  
45  
46 questions related to the accuracy or integrity of any part of the work are appropriately  
47  
48 investigated and resolved.  
49  
50  
51  
52  
53  
54  
55

### 56 57 **Data sharing statement**

58  
59  
60

1  
2  
3  
4  
5  
6  
7  
8  
9  
10  
11  
12  
13  
14  
15  
16  
17  
18  
19  
20  
21  
22  
23  
24  
25  
26  
27  
28  
29  
30  
31  
32  
33  
34  
35  
36  
37  
38  
39  
40  
41  
42  
43  
44  
45  
46  
47  
48  
49  
50  
51  
52  
53  
54  
55  
56  
57  
58  
59  
60

No additional unpublished is available.

For peer review only

## References

- 1 Iso H. Lifestyle and cardiovascular disease in Japan. *J Atheroscler Thromb* 2011;18:83–8.
- 2 Gotto AM Jr. Jeremiah Metzger Lecture: cholesterol, inflammation and atherosclerotic cardiovascular disease: is it all LDL? *Trans Am Clin Climatol Assoc* 2011;122:256–89.
- 3 Baigent C, Keech A, Kearney PM, et al. Efficacy and safety of cholesterol-lowering treatment: prospective meta-analysis of data from 90,056 participants in 14 randomised trials of statins. *Lancet* 2005;366:1267–78.
- 4 Cholesterol Treatment Trialists' (CTT) Collaboration, Baigent C, Blackwell L, et al. Efficacy and safety of more intensive lowering of LDL Cholesterol: a meta-analysis of data from 170,000 participants in 26 randomised trials. *Lancet* 2010;376:1670–81.
- 5 Grundy SM, Cleeman JI, Merz CN, et al. Implications of recent clinical trials for the National Cholesterol Education Program Adult Treatment Panel III guidelines. *Circulation* 2004;110:227–39.
- 6 European Association for Cardiovascular Prevention and Rehabilitation, Reiner Z, Catapano AL, et al. ESC/EAS Guidelines for the management of dyslipidaemias: the Task Force for the management of dyslipidaemias of the European Society of Cardiology (ESC) and the European Atherosclerosis Society (EAS). *Eur Heart J* 2011;32:1769–818.
- 7 O'Keefe JH, Jr., Cordain L, Harris WH, et al. Optimal low-density lipoprotein is 50 to 70 mg/dl: lower is better and physiologically normal. *J Am Coll Cardiol* 2004;43:2142–6.
- 8 LaRosa JC, Grundy SM, Waters DD, et al. Intensive lipid lowering with atorvastatin in patients with stable coronary disease. *N Engl J Med* 2005;352:1425–35.

1  
2  
3 9 Expert Panel on Detection, Evaluation, and Treatment of High Blood Cholesterol in Adults.  
4  
5 Executive Summary of The Third Report of The National Cholesterol Education Program  
6  
7  
8 (NCEP) Expert Panel on Detection, Evaluation, And Treatment of High Blood Cholesterol In  
9  
10 Adults (Adult Treatment Panel III). *JAMA* 2001;285:2486–97.

11  
12  
13 10 Stone NJ, Robinson JG, Lichtenstein AH, et al. 2013 ACC/AHA Guideline on the Treatment  
14  
15 of Blood Cholesterol to Reduce Atherosclerotic Cardiovascular Risk in Adults: A Report of the  
16  
17 American College of Cardiology/American Heart Association Task Force on Practice Guidelines.  
18  
19  
20  
21 *Circulation* 2014;129:S1–45.

22  
23 11 Teramoto T, Sasaki J, Ishibashi S, et al. Executive summary of the Japan Atherosclerosis  
24  
25 Society (JAS) guidelines for the diagnosis and prevention of atherosclerotic cardiovascular  
26  
27 diseases in Japan -2012 version. *J Atheroscler Thromb* 2013;20:517–23.

28  
29  
30  
31 12 Okazaki S, Yokoyama T, Miyauchi K, et al. Early statin treatment in patients with acute  
32  
33 coronary syndrome: demonstration of the beneficial effect on atherosclerotic lesions by serial  
34  
35 volumetric intravascular ultrasound analysis during half a year after coronary event: the  
36  
37 ESTABLISH Study. *Circulation* 2004;110:1061–8.

38  
39  
40  
41 13 Dohi T, Miyauchi K, Okazaki S, et al. Early intensive statin treatment for six months  
42  
43 improves long-term clinical outcomes in patients with acute coronary syndrome (Extended-  
44  
45 ESTABLISH trial): a follow-up study. *Atherosclerosis* 2010;210:497–502.

46  
47  
48 14 Nakamura H, Arakawa K, Itakura H, et al. Primary prevention of cardiovascular disease with  
49  
50 pravastatin in Japan (MEGA Study): a prospective randomised controlled trial. *Lancet*  
51  
52  
53 2006;368:1155–63.



1  
2  
3 15 Okazaki S, Yokoyama T, Miyauchi K, et al. Early statin treatment in patients with acute  
4 coronary syndrome: demonstration of the beneficial effect on atherosclerotic lesions by serial  
5 volumetric intravascular ultrasound analysis during half a year after coronary event: the  
6 ESTABLISH Study. *Circulation* 2004;110:1061–8.  
7  
8  
9

10  
11  
12  
13 16 Hiro T, Kimura T, Morimoto T, et al. Effect of intensive statin therapy on regression of  
14 coronary atherosclerosis in patients with acute coronary syndrome: a multicenter randomized  
15 trial evaluated by volumetric intravascular ultrasound using pitavastatin versus atorvastatin  
16 (JAPAN-ACS [Japan assessment of pitavastatin and atorvastatin in acute coronary syndrome]  
17 study). *J Am Coll Cardiol* 2009;54:293–302.  
18  
19  
20  
21  
22  
23  
24

25  
26 17 Takayama T, Hiro T, Yamagishi M, et al. Effect of rosuvastatin on coronary atheroma in stable  
27 coronary artery disease: multicenter coronary atherosclerosis study measuring effects of  
28 rosuvastatin using intravascular ultrasound in Japanese subjects (COSMOS). *Circ J*  
29  
30  
31  
32 2009;73:2110–7.  
33  
34

35  
36 18 Nakajima N, Miyauchi K, Yokoyama T, et al. Effect of combination of ezetimibe and a statin  
37 on coronary plaque regression in patients with acute coronary syndrome ZEUS trial (eZEtimibe  
38 Ultrasound Study). *IJC Metabolic & Endocrine* 2014;3:8–13.  
39  
40  
41  
42

43  
44 19 Tsujita K, Sugiyama S, Sumida H, et al. Impact of Dual Lipid-Lowering Strategy With  
45 Ezetimibe and Atorvastatin on Coronary Plaque Regression in Patients With Percutaneous  
46 Coronary Intervention: The Multicenter Randomized Controlled PRECISE-IVUS Trial. *J Am*  
47  
48  
49  
50  
51  
52  
53  
54  
55  
56  
57  
58  
59  
60

- 1  
2  
3 20 Harada-Shiba M, Arai H, Okamura T, et al. Multicenter study to determine the diagnosis  
4 criteria of heterozygous familial hypercholesterolemia in Japan. *J Atheroscler Thromb*  
5  
6 2012;19:1019–26.  
7  
8  
9  
10  
11 21 Nordestgaard BG, Chapman MJ, Humphries SE, et al. Familial hypercholesterolaemia is  
12 underdiagnosed and undertreated in the general population: guidance for clinicians to prevent  
13 coronary heart disease: consensus statement of the European Atherosclerosis Society. *Eur Heart*  
14  
15 *J* 2013;34:3478–90a.  
16  
17  
18  
19  
20 22 Risk of fatal coronary heart disease in familial hypercholesterolaemia. Scientific Steering  
21 Committee on behalf of the Simon Broome Register Group. *BMJ* 1991;303:893–6.  
22  
23  
24  
25 23 Tada N, Yoshida H, Teramoto T, et al. Investigation on risk factors in patients with high LDL  
26 cholesterol and HDL cholesterol and treatment on hyperlipidaemia in Japan—Lipid Management  
27 Program (LiMAP) in Japan— [in Japanese]. *The Journal of Adult Diseases* 2005;35:1187–97.  
28  
29  
30  
31  
32  
33 24 Nanchen D, Gencer B, Muller O, et al. Prognosis of Patients with Familial  
34 Hypercholesterolemia After Acute Coronary Syndromes. *Circulation*.  
35  
36 2016;pii:CIRCULATIONAHA.116.023007. [Epub ahead of print].  
37  
38  
39  
40 25 Roth EM, Diller P. Alirocumab for hyperlipidemia: physiology of PCSK9 inhibition,  
41 pharmacodynamics and Phase I and II clinical trial results of a PCSK9 monoclonal antibody.  
42  
43 *Future Cardiol* 2014;10:183–99.  
44  
45  
46  
47  
48 26 Raal F, Panz V, Immelman A, et al. Elevated PCSK9 levels in untreated patients with  
49 heterozygous or homozygous familial hypercholesterolemia and the response to high-dose statin  
50 therapy. *J Am Heart Assoc* 2013;2:e000028  
51  
52  
53  
54  
55  
56  
57  
58  
59  
60

1  
2  
3 27 Guo YL, Zhang W, Li JJ. PCSK9 and lipid lowering drugs. *Clinica Chimica Acta*  
4  
5 2014;437:66–71.  
6  
7

8  
9 28 Schwartz GG, Bessac L, Berdan LG, et al. Effect of alirocumab, a monoclonal antibody to  
10  
11 PCSK9, on long-term cardiovascular outcomes following acute coronary syndromes: Rationale  
12  
13 and design of the ODYSSEY Outcomes trial. *Am Heart J* 2014;168:682–9.  
14  
15

16 29 Thygesen K, Alpert JS, Jaffe AS, et al. Third universal definition of myocardial infarction.  
17  
18 *Eur Heart J* 2012;33:2551–67.  
19  
20

21 30 Miyauchi K, Morino Y, Tsukahara K, et al. The PACIFIC (Prevention of Atherothrombotic  
22  
23 Incidents Following Ischemic Coronary attack) Registry: Rationale and design of a 2-year study  
24  
25 in patients initially hospitalised with acute coronary syndrome in Japan. *Cardiovasc Drugs Ther*  
26  
27 2010;24:77–83.  
28  
29  
30  
31  
32  
33  
34  
35  
36  
37  
38  
39  
40  
41  
42  
43  
44  
45  
46  
47  
48  
49  
50  
51  
52  
53  
54  
55  
56  
57  
58  
59  
60

## Figure legends

**Figure 1** Number of patients diagnosed with familial hypercholesterolaemia by country. FH, familial hypercholesterolaemia. Reproduced from Nordestgaard et al.[15] with permission from the European Heart Journal.

**Figure 2** Study flow and design. <sup>a</sup>For FH gene examination, blood will be collected once from the patients who provide consent, at a visit made after registration. <sup>b</sup>Radiographs of the Achilles tendon will be obtained during hospitalisation for registration as a rule, but a radiography obtained by Visit 3 is acceptable. FH, familial hypercholesterolaemia; PCSK9, proprotein convertase subtilisin kexin 9

1  
2  
3 **Appendix: EXPLORE-J Study Centres**  
4

5  
6 Almeida Memorial Hospital  
7

8  
9 Anjo Kosei Hospital  
10

11  
12 Chiba Emergency Medical Center  
13

14  
15 Chiba University Graduate School of Medicine  
16

17  
18 Fukui Cardiovascular Center  
19

20  
21 Fukuoka Tokushukai Hospital  
22

23  
24 Gifu Heart Center  
25

26  
27 Gifu Prefectural General Medical Center  
28

29  
30 Gunma Prefectural Cardiovascular Center  
31

32  
33 Hakodate Municipal Hospital  
34

35  
36 Higashi Takarazuka Satoh Hospital  
37

38  
39 Higashiyamato Hospital  
40

41  
42 Hiroshima City Hospital  
43

44  
45 Hyogo Brain and Heart Center  
46

47  
48 Iwaki Kyoritsu General Hospital  
49

50  
51 Iwatsuki Minami Hospital  
52

53  
54 Jichi Medical University School of Medicine  
55

56  
57 Juntendo University Graduate School of Medicine  
58  
59  
60

1  
2  
3 Juntendo University Shizuoka Hospital  
4  
5

6 Kanazawa Cardiovascular Hospital  
7  
8

9 Kikuna Memorial Hospital  
10  
11

12 Kishiwada Tokushukai Hospital  
13  
14

15 Kitasato University School of Medicine  
16  
17

18 KKR Takamatsu Hospital  
19  
20

21 Kokura Memorial Hospital  
22  
23

24 Kumamoto University Hospital  
25  
26

27 Kurashiki Central Hospital  
28  
29

30 Kurume University School of Medicine  
31  
32

33 Kyorin University School of Medicine  
34  
35

36 Mitsui Memorial Hospital  
37  
38

39 Nagoya Daini Red Cross Hospital  
40  
41

42 National Cerebral and Cardiovascular Center  
43  
44

45 National Hospital Organization Kure Medical Center and Chugoku Cancer Center  
46  
47

48 Nihon University Itabashi Hospital  
49  
50

51 Nihon University School of Medicine  
52  
53

54 Nippon Medical School  
55  
56

57 Nippon Medical School Musashi-Kosugi Hospital  
58  
59  
60

1  
2  
3 Ome Municipal General Hospital  
4

5  
6 Osaka General Medical Center  
7

8  
9 Rinku General Hospital  
10

11  
12 Saga-Ken Medical Centre Koseikan  
13

14  
15 Saiseikai Fukuoka General Hospital  
16

17  
18 Saiseikai Kumamoto Hospital  
19

20  
21 Sakakibara Heart Institute  
22

23  
24 Sakurabashi Watanabe Hospital  
25

26  
27 Sekishinkai Kawasaki Saiwai Hospital  
28

29  
30 Sendai Kousei Hospital  
31

32  
33 Showa University Northern Yokohama Hospital  
34

35  
36 St. Mary's Hospital  
37

38  
39 Teikyo University School of Medicine  
40

41  
42 The Sakakibara Heart Institute of Okayama  
43

44  
45 Toho University School of Medicine  
46

47  
48 Tokai University School of Medicine  
49

50  
51 Tokorozawa Heart Center  
52

53  
54 Tokushima Prefectural Central Hospital  
55

56  
57 Tokuyama Central Hospital  
58  
59  
60

1  
2  
3  
4  
5  
6  
7  
8  
9  
10  
11  
12  
13  
14  
15  
16  
17  
18  
19  
20  
21  
22  
23  
24  
25  
26  
27  
28  
29  
30  
31  
32  
33  
34  
35  
36  
37  
38  
39  
40  
41  
42  
43  
44  
45  
46  
47  
48  
49  
50  
51  
52  
53  
54  
55  
56  
57  
58  
59  
60

Tokyo Women’s Medical University

Yokohama City University Medical Center

Yokohama Rosai Hospital

For peer review only



Figure 1

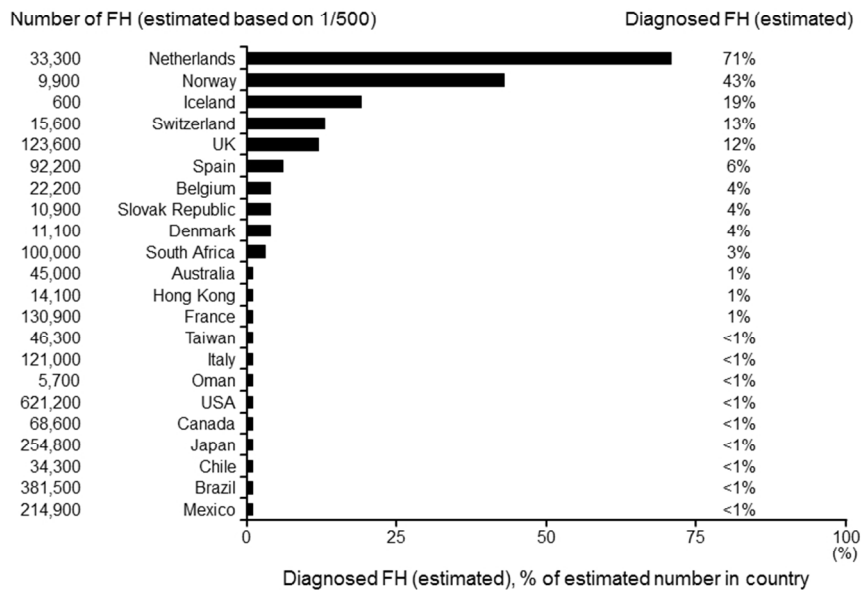

Figure 1

254x190mm (96 x 96 DPI)

ew only

1  
2  
3  
4  
5  
6  
7  
8  
9  
10  
11  
12  
13  
14  
15  
16  
17  
18  
19  
20  
21  
22  
23  
24  
25  
26  
27  
28  
29  
30  
31  
32  
33  
34  
35  
36  
37  
38  
39  
40  
41  
42  
43  
44  
45  
46  
47  
48  
49  
50  
51  
52  
53  
54  
55  
56  
57  
58  
59  
60

Figure 2

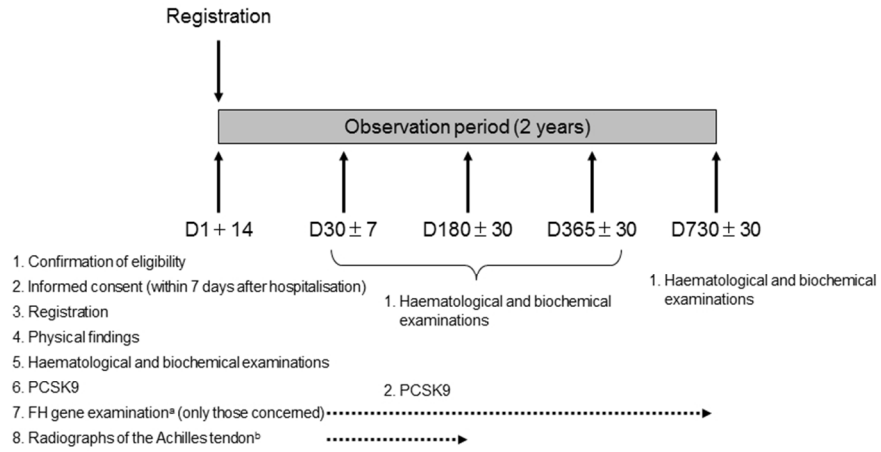

Figure 2

254x190mm (96 x 96 DPI)

ew only

# BMJ Open

## Exploration into lipid management and persistent risk in patients hospitalised for acute coronary syndrome in Japan (EXPLORE-J): Protocol for a prospective observational study

|                                 |                                                                                                                                                                                                                                                                                                                                                                                                                                                                                                                                                                                                      |
|---------------------------------|------------------------------------------------------------------------------------------------------------------------------------------------------------------------------------------------------------------------------------------------------------------------------------------------------------------------------------------------------------------------------------------------------------------------------------------------------------------------------------------------------------------------------------------------------------------------------------------------------|
| Journal:                        | <i>BMJ Open</i>                                                                                                                                                                                                                                                                                                                                                                                                                                                                                                                                                                                      |
| Manuscript ID                   | bmjopen-2016-014427.R1                                                                                                                                                                                                                                                                                                                                                                                                                                                                                                                                                                               |
| Article Type:                   | Protocol                                                                                                                                                                                                                                                                                                                                                                                                                                                                                                                                                                                             |
| Date Submitted by the Author:   | 11-Mar-2017                                                                                                                                                                                                                                                                                                                                                                                                                                                                                                                                                                                          |
| Complete List of Authors:       | Nakamura, Masato; Toho University Ohashi Medical Center, Division of Cardiovascular Medicine<br>Uno, Kiyoko; Sanofi<br>Hirayama, Atsushi ; Nihon University School of Medicine, Division of Cardiology<br>Ako, Junya; Kitasato University, Department of Cardiovascular Medicine<br>Nohara, Atsushi; Kanazawa University of Graduate School of Medical Sciences, Department of Lipidology<br>Arai, Hidenori; National Center for Geriatrics and Gerontology<br>Harada-Shiba, Mariko ; National Cerebral & Cardiovascular Center Research Institute, Department of Molecular Innovation in Lipidology |
| <b>Primary Subject Heading</b>: | Cardiovascular medicine                                                                                                                                                                                                                                                                                                                                                                                                                                                                                                                                                                              |
| Secondary Subject Heading:      | Cardiovascular medicine                                                                                                                                                                                                                                                                                                                                                                                                                                                                                                                                                                              |
| Keywords:                       | acute coronary syndrome, familial hypercholesterolaemia, Japan, lipid management, proprotein convertase subtilisin kexin 9                                                                                                                                                                                                                                                                                                                                                                                                                                                                           |
|                                 |                                                                                                                                                                                                                                                                                                                                                                                                                                                                                                                                                                                                      |

SCHOLARONE™  
Manuscripts

1  
2  
3 1 **Exploration into lipid management and persistent risk in patients hospitalised for acute**  
4  
5  
6 2 **coronary syndrome in Japan (EXPLORE-J): Protocol for a prospective observational**  
7  
8 3 **study**  
9  
10 4

11  
12  
13 5 Masato Nakamura<sup>1</sup>, Kiyoko Uno<sup>2</sup>, Atsushi Hirayama<sup>3</sup>, Junya Ako<sup>4</sup>, Atsushi Nohara<sup>5</sup>, Hidenori  
14  
15 6 Arai<sup>6</sup>, and Mariko Harada-Shiba<sup>7</sup>  
16  
17 7

18  
19  
20 8 1) Division of Cardiovascular Medicine, Toho University Ohashi Medical Center, Tokyo, Japan;

21  
22 9 2) Sanofi, Tokyo, Japan; 3) Division of Cardiology, Nihon University School of Medicine,

23  
24 10 Tokyo, Japan; 4) Department of Cardiovascular Medicine, Kitasato University, Kanagawa,

25  
26 11 Japan; 5) Department of Lipidology, Kanazawa University of Graduate School of Medical

27  
28 12 Sciences, Kanazawa, Japan; 6) National Center for Geriatrics and Gerontology, Aichi, Japan; 7)

29  
30 13 Department of Molecular Innovation in Lipidology, National Cerebral & Cardiovascular Center

31  
32 14 Research Institute, Osaka, Japan  
33  
34  
35  
36  
37  
38  
39  
40  
41  
42  
43  
44  
45  
46  
47  
48  
49  
50  
51  
52  
53  
54  
55  
56  
57  
58  
59  
60

16 **Corresponding author:**

17 Masato Nakamura, MD

18 Professor, Division of Cardiovascular Medicine

19 Toho University Ohashi Medical Center

20 2-17-6 Ohashi, Meguro-ku, Tokyo 153-8515, Japan

21 Tel: +81-3-3468-1251

22 Fax: +81-3-3468-1269

23 E-mail: masato@oha.toho-u.ac.jp

1  
2  
3 24  
4  
5  
6 25 **Key words:** acute coronary syndrome, familial hypercholesterolaemia, Japan, lipid management,  
7  
8 26 proprotein convertase subtilisin kexin 9  
9  
10  
11  
12  
13  
14  
15  
16  
17  
18  
19  
20  
21  
22  
23  
24  
25  
26  
27  
28  
29  
30  
31  
32  
33  
34  
35  
36  
37  
38  
39  
40  
41  
42  
43  
44  
45  
46  
47  
48  
49  
50  
51  
52  
53  
54  
55  
56  
57  
58  
59  
60

For peer review only

1  
2  
3 **27 Abstract**  
4

5  
6 **28 Introduction** The present study is the largest registry study ever conducted in Japan exploring  
7  
8  
9 **29** the prevalence of familial hypercholesterolaemia (FH) among acute coronary syndrome (ACS)  
10  
11 **30** patients. Our study aims to (1) evaluate the status of lipid management and the subsequent risk of  
12  
13 **31** major cardiovascular events following hospitalisation of Japanese ACS patients in real-world  
14  
15 **32** clinical practice; (2) determine the proportion of Japanese ACS patients who achieve the lipid  
16  
17 **33** management goal and have a reduction of event risks with strict lipid management (low-density  
18  
19 **34** lipoprotein-cholesterol <1.81 mmol/L); (3) determine the prevalence of FH; and (4) investigate  
20  
21 **35** the clinical significance of proprotein convertase subtilisin kexin 9 (PCSK9) level.  
22  
23

24  
25 **36 Methods and analysis** We will conduct a multicentre, prospective, observational study of  
26  
27  
28 **37** approximately 2,000 Japanese ACS patients with/without FH hospitalised between April 2015  
29  
30 **38** and August 2016. The primary endpoint is the incidence of major adverse cardiovascular events  
31  
32 **39** (MACEs) after initial hospitalisation. The secondary endpoints are (1) MACE developed from  
33  
34 **40** Visit 1 to Visit 2 (Day 30); (2) MACE developed from Visit 2 (Day 30) to Visit 5 (Day 730); (3)  
35  
36 **41** treatment rate by lipid-lowering therapies (any statin or intensive, PCSK9 inhibitor, fibrates, and  
37  
38 **42** ezetimibe); (4) incidence of events by the addition of the following outcomes to the primary  
39  
40 **43** endpoint: coronary revascularisation due to myocardial ischaemia, revascularisation other than  
41  
42 **44** coronary artery, inpatient treatment for occurrence or exacerbation of heart failure, transient  
43  
44 **45** ischaemic attack, acute arterial occlusion, central retinal artery occlusion, and other adverse  
45  
46 **46** events prolonging or requiring hospitalisation; and (5) proportion of subjects achieving target  
47  
48 **47** lipid levels.  
49  
50  
51  
52

53  
54 **48 Ethics and dissemination** The study protocol was submitted to the ethical review committee of  
55  
56  
57 **49** each participating centre for approval. Participation in the study is voluntary and anonymous.  
58  
59  
60

1  
2  
3 50 The study findings will be disseminated in international peer-reviewed journals and presented at  
4  
5  
6 51 relevant conferences.  
7

8  
9 52 **Clinical trial registration:** UMIN000018946  
10

11 53  
12

13 54  
14  
15  
16  
17  
18  
19  
20  
21  
22  
23  
24  
25  
26  
27  
28  
29  
30  
31  
32  
33  
34  
35  
36  
37  
38  
39  
40  
41  
42  
43  
44  
45  
46  
47  
48  
49  
50  
51  
52  
53  
54  
55  
56  
57  
58  
59  
60

For peer review only

### 55 **Strengths and limitations of this study**

- 56 • This study will provide new insights into the relationship between acute coronary syndrome  
57 (ACS) and recurrent events and the relationship between recurrent events and serum low-  
58 density lipoprotein-cholesterol levels in Japanese ACS patients.
- 59 • This study will be the first to evaluate the familial hypercholesterolaemia (FH) to ACS ratio  
60 and will provide important information regarding PCSK9 concentrations, including (1) the  
61 dynamic change of PCSK9 concentrations during post-ACS medical management, (2) the  
62 relationship between PCSK9 concentrations and cardiovascular events, (3) the difference of  
63 PCSK9 concentrations between FH and non-FH, and (4) the relationship among PCSK9  
64 concentrations, lipid parameters and lipid lowering therapies for both statin-naïve and statin-  
65 exposed patients.
- 66 • This study will be a prospective, large-scale, observational study of approximately 2,000  
67 Japanese ACS patients from 59 participating centres.
- 68 • This study is the largest FH registry study in Japan targeting the high-risk population.
- 69 • This study will be limited by the inherent limitations of the observational study design (e.g.,  
70 susceptibility to biases and confounders, and the inability to establish causality) and the small  
71 sample size; the generalisability of our findings will be limited to the Japanese population.



## 76 INTRODUCTION

77 The incidence of atherosclerotic disease, including heart disease, in Japan is increasing and is  
78 associated with a change towards a Western lifestyle and increase in dyslipidaemia.[1] There is a  
79 positive correlation between low-density lipoprotein-cholesterol (LDL-C) levels and the  
80 incidence of coronary artery disease.[2, 3] Therapy to lower LDL-C helps prevent cardiovascular  
81 events. Large statin trials have demonstrated the benefits of achieving an LDL-C level of 1.42–  
82 2.02 mmol/L, which has served as a basis for more aggressive European and US guidelines [4].  
83 In particular, aggressive therapy to achieve LDL-C <1.81 mmol/L, the target value for lipid  
84 management (in patients for whom aggressive therapy is intended) in European and US  
85 guidelines,[5-7] or the use of high-intensity statins according to American College of  
86 Cardiology/American Heart Association guidelines have helped to reduce cardiovascular events  
87 and the progression of atherosclerosis.[5-11]

88 However, the Japanese guidelines for the prevention of atherosclerosis published in 2012 set  
89 higher target values for LDL-C management at <3.11 mmol/L in primary prevention for high-  
90 risk patients and <2.59 mmol/L for secondary prevention because the evidence for benefit was  
91 suggested to be insufficient.[12] Previous Japanese studies (ESTABLISH and the follow-up  
92 Extended-ESTABLISH study) reported that aggressive LDL-C lowering reduced the incidence  
93 of death, the recurrence of acute coronary syndrome (ACS), and cerebral infarction compared  
94 with a control group.[13, 14] The MEGA study showed the benefit of lipid-lowering therapy in  
95 Japanese patients, but to values higher than 2.59 mmol/L.[15] While a number of imaging  
96 studies with intravascular ultrasound and other modalities have shown the benefits of aggressive  
97 LDL-C-lowering therapy in Japanese patients in terms of reduced plaque volume or coronary  
98 plaque regression,[16-20] there is no large-scale clinical study that shows the need for aggressive

1  
2  
3 99 lipid-lowering therapy in Japan, especially to LDL-C target values lower than 2.59 mmol/L. It is  
4  
5  
6 100 generally accepted that insufficient evidence is available to determine the benefit of such therapy.  
7  
8 101 Therefore, investigations into this issue, and evaluation of a possible relationship between LDL-  
9  
10 102 C and recurrent coronary events and coronary artery disease progression in Japan are needed.

13 103 Familial hypercholesterolaemia (FH) is an inherited, autosomal dominant disease resulting  
14  
15 104 from abnormalities in the genes coding for the LDL receptor and related molecules. It is  
16  
17 105 characterised by three major signs: (i) hyper-LDL-cholesterolaemia; (ii) early onset coronary  
18  
19 106 artery diseases; and (iii) tendon/skin xanthoma. Untreated FH carries an extremely high risk of  
20  
21 107 developing coronary artery diseases, particularly in men aged between 30 and 50 years and  
22  
23 108 women aged between 40 and 70 years.[21, 22] Risk data from the Simon Broome study in 1991  
24  
25 109 showed that the risk of cardiovascular death was 99 times higher in patients with FH at ages 20–  
26  
27 110 39 years.[23] Although heterozygous FH is present in an estimated 300,000 patients in  
28  
29 111 Japan,[24] the diagnosis rate is only <1% of the estimated number of patients with FH in  
30  
31 112 Japan.[22] According to an investigation by the Ministry of Health, Labour and Welfare in  
32  
33 113 Japan,[21] the prevalence of FH is 4%–19% of patients presenting with ACS. FH may be under-  
34  
35 114 diagnosed because of a masking affect by statin therapy, or the transient reduction of LDL-C  
36  
37 115 associated with acute myocardial infarction. A prospective cohort observational study of 4,534  
38  
39 116 patients with ACS in Switzerland reported an FH prevalence of 1.6%–5.5%, and a higher  
40  
41 117 adjusted risk of coronary death or myocardial infarction among patients with FH than without  
42  
43 118 (hazard ratio, 2.46–3.53 after 1 year).[25] To date there have been no reports regarding the ACS  
44  
45 119 recurrence rate in patients with FH in Japan. Therefore, it is important to clarify the prevalence  
46  
47 120 of FH in patients with ACS, the recurrence rate of cardiovascular events in patients with FH, and  
48  
49 121 risk factors for recurrence to provide the optimal treatment for Japanese patients with FH.  
50  
51  
52  
53  
54  
55  
56  
57  
58  
59  
60

1  
2  
3 122 Proprotein convertase subtilisin kexin 9 (PCSK9) is a protein that binds to LDL receptors to  
4  
5  
6 123 induce their degradation in intracellular lysosomes and inhibit their recycling.[26] Interestingly,  
7  
8 124 patients with loss-of-function mutations in the *PCSK9* gene have low LDL-C levels and rarely  
9  
10 125 develop cardiovascular diseases compared with normal individuals. PCSK9 inhibitors are an  
11  
12 126 effective lipid-lowering therapy. PCSK9 and LDL-C levels show a positive correlation in  
13  
14 127 patients not treated with a lipid-lowering therapy, but this relationship disappears when lipid-  
15  
16 128 lowering therapies, particularly oral statins, are administered.[27,28] Statins may simultaneously  
17  
18 129 increase the concentration of PCSK9 and the expression of LDL receptors, while lowering LDL-  
19  
20 130 C.[27] However, despite our current knowledge of PCSK9, its clinical significance in ACS  
21  
22 131 patients remains unclear. Considering the above-mentioned gaps in the literature, the primary  
23  
24 132 objective of this study is to evaluate the status of lipid management and risk of major  
25  
26 133 cardiovascular events in Japanese ACS patients in real-world clinical practice. Secondary study  
27  
28 134 objectives are to identify the proportion of ACS patients in Japan who (i) achieve the target value  
29  
30 135 of lipid management (LDL-C  $\leq 2.59$  mmol/L); (ii) have a reduction of event risks with strict lipid  
31  
32 136 management (LDL-C  $< 1.81$  mmol/L); and (iii) who have FH. The risk of recurrent ACS in  
33  
34 137 patients with FH compared with patients without FH will be determined using the diagnostic  
35  
36 138 criteria for FH as shown in **Table 1**. Other objectives are to investigate the clinical significance  
37  
38 139 of PCSK9 concentrations by observing the time-course profile of PCSK9 concentrations in  
39  
40 140 patients presenting with ACS and analysing the relationship between the concentration of PCSK9  
41  
42 141 and FH, lipid-lowering therapy, and lipid management levels.  
43  
44  
45  
46  
47  
48  
49  
50

142

51  
52  
53  
54 143 **Table 1**<sup>a</sup> Diagnostic criteria for heterozygous FH in adults (aged 15 years and older)  
55  
56  
57  
58  
59  
60

|                                                                                                                               |
|-------------------------------------------------------------------------------------------------------------------------------|
| Hyper LDL cholesterolaemia (LDL-C $\geq$ 180 mg/dL before treatment)                                                          |
| Tendon xanthoma (tendon xanthoma in the back of hand, elbow, knee, etc. or Achilles tendon hypertrophy) or xanthoma tuberosum |
| Family history (blood relatives within the second degree of kinship) of FH or early onset coronary artery disease             |

#### Notes

- *Diagnosis is established excluding secondary hyperlipidaemia.*
  - *FH is diagnosed when two or more items are met. Diagnosis by genetic examination is advised if FH is suspected.*
  - *Tuberous xanthoma does not include xanthelasma of the eyelid.*
  - *Achilles tendon hypertrophy is diagnosed by a thickness of  $\geq$ 9 mm on soft-X-ray imaging.*
  - *FH is strongly suspected if LDL-C is  $\geq$ 250 mg/dL.*
  - *If the patient is already on drug therapy, refer to the lipid level that triggered the treatment.*
  - *Early onset coronary artery diseases are defined as those in which onset occurs at <55 years of age in men and <65 years of age in women.*
- <sup>a</sup>Reproduced with modifications Harada-Shiba et al.[21] with permission from the *Journal of Atherosclerosis and Thrombosis*.
- FH, familial hypercholesterolaemia; LDL, low-density lipoprotein.

## METHODS AND ANALYSIS

### Study design

This will be a multicentre, prospective, observational study of Japanese patients presenting with ACS. Sixty-five sites are planned to participate in this study (see **Appendix**). These sites were chosen based on their ability to provide the most advanced percutaneous coronary intervention in Japan for patients presenting with ACS. Consecutive patients requiring hospitalisation for ACS were registered in 59 sites, for a total of 2,016 patients, between April 2015 and August 2016.

After the patients provided written informed consent within 7 days after hospitalisation for ACS, the investigator at each study centre successively registered subjects who met the inclusion

168 criteria. Successive registration of patients limits the selection bias by the investigator. The  
 169 schedule for initial and follow-up examinations and the data to be collected are shown in **Figure**  
 170 **1** and **Table 2**.

172 **Table 2** Observations and endpoints

| Category                                              | Method and materials              | Observation and examination items                                                                                                                                                       |
|-------------------------------------------------------|-----------------------------------|-----------------------------------------------------------------------------------------------------------------------------------------------------------------------------------------|
| Demographic characteristics (subjects' background)    | Interview                         | Age, sex, and smoking and drinking status                                                                                                                                               |
| ACS                                                   | Medical examination and interview | Onset date of ACS, date of hospitalisation, disease type, description of treatment                                                                                                      |
| History of present illness/previous history/therapies | Interview                         | Particular previous history of cardiovascular diseases and cardiovascular risk-related diseases and history of their treatments (immediately before hospitalisation and at each visit). |
| Physical findings                                     | Medical examination               | Body height, body weight, and presence or absence of xanthoma                                                                                                                           |
| Reference LDL-C value                                 | Interview                         | Value before treatment such as that obtained at a health examination                                                                                                                    |
| Family history                                        | Interview                         | Coronary artery diseases, ischaemic cerebral infarction, and hypercholesterolaemia in relatives to the second                                                                           |

| Category                                        | Method and materials | Observation and examination items                                                                                                                                                                                                                                                                                         |
|-------------------------------------------------|----------------------|---------------------------------------------------------------------------------------------------------------------------------------------------------------------------------------------------------------------------------------------------------------------------------------------------------------------------|
|                                                 |                      | degree of kinship.                                                                                                                                                                                                                                                                                                        |
| Primary endpoints                               | Interview            | Investigation of outcome (alive or dead), date of death, cause of death, and presence or absence of non-fatal ACS and non-fatal cerebrovascular diseases requiring in-hospital treatments                                                                                                                                 |
| Secondary endpoints                             | Interview            | Presence or absence of event                                                                                                                                                                                                                                                                                              |
| Haematological and biochemical examinations     | Serum                | The following parameters will be measured from blood obtained in the sitting position when the symptoms are stable:<br>Total cholesterol, HDL cholesterol, LDL cholesterol (automatic calculation), triglycerides, apoA1, apoB, Lp(a), creatinine, blood glucose, HbA <sub>1c</sub> , hsCRP, haemoglobin, and haematocrit |
| PCSK9                                           | Serum                | Collective measurement at the central laboratory                                                                                                                                                                                                                                                                          |
| FH gene examination                             | Whole blood          | Collective measurement at the central laboratory                                                                                                                                                                                                                                                                          |
| Radiography of the Achilles tendon <sup>a</sup> | Radiography          | Whenever possible, radiography of the Achilles tendon will be performed during index hospitalisation for registration, but radiography obtained by Visit 3 will also be acceptable                                                                                                                                        |

173 <sup>a</sup>Radiography of the Achilles tendon was performed based on the recommendation of the Japan  
 174 Atherosclerosis Society FH guidelines.[21]  
 175 ACS, acute coronary syndrome; LDL-C, low-density lipoprotein cholesterol; PCSK9, proprotein  
 176 convertase subtilisin kexin 9; apo, apolipoprotein; HDL, high-density lipoprotein; HbA<sub>1c</sub>

1  
2  
3 177 glycosylated haemoglobin; hsCRP, high sensitivity C-reactive protein; Lp(a), lipoprotein A; FH,  
4 178 familial hypercholesterolaemia.  
5  
6 179

7  
8  
9 180 Data are collected at Visit 1 (within 14 days after hospitalisation due to ACS), and Visits 2 to  
10  
11 181 5 during the 2-year observational period on Days 30 ( $\pm 7$  days), 180 ( $\pm 30$  days), 365 ( $\pm 30$  days),  
12  
13 182 and 730 ( $\pm 30$  days). Data are collected using an electronic case report form. The information  
14  
15  
16 183 collected at each visit is shown in **Table 2**. During the 2-year observation period (Visits 2–5), if a  
17  
18 184 subject is transferred to another hospital during this time, the institution will be asked to provide  
19  
20 185 the following information for the follow-up: attendance/non-attendance; date of observation;  
21  
22 186 primary endpoints (investigation of outcome [alive/dead]); secondary endpoints (presence or  
23  
24  
25 187 absence); physical examination; fasting haematological and biochemical examinations, including  
26  
27 188 PCSK9 concentrations (Visits 2–4); and medications.

28  
29  
30 189 The samples collected in this study will be sent to a central laboratory (BML General  
31  
32 190 Laboratory BML, INC., Saitama, Japan) under freezing conditions ( $-20^{\circ}\text{C}$ ) until completion of  
33  
34 191 the study so that re-examination can be performed. All samples will be discarded after  
35  
36 192 completion of the study.  
37  
38  
39

40 193

#### 41 42 43 194 **Study subjects**

44  
45  
46 195 The study subjects are Japanese patients presenting with ACS, hospitalised between April 2015  
47  
48 196 and August 2016. In total, 2,016 subjects were registered.  
49  
50

51 197 The key inclusion criteria are as follows: age  $\geq 20$  years; hospitalisation for any ACS  
52  
53 198 including ST-segment elevation myocardial infarction (STEMI), non ST-segment elevation  
54  
55 199 myocardial infarction (NSTEMI), and unstable angina; and ability to obtain written informed  
56  
57  
58  
59  
60

1  
2  
3 200 consent. STEMI is defined as the presence of chest symptoms such as pain or breathlessness  
4  
5 201 suspected to be caused by myocardial ischaemia, persisting for  $\geq 20$  min; ST elevation of  $\geq 1$  mm  
6  
7  
8 202 on  $\geq 2$  contiguous leads or new left bundle branch block; and elevated troponin T  $\geq 0.1$   $\mu\text{g/L}$  or  
9  
10 203 creatine phosphokinase-MB two times above the upper limit of normal. Acute NSTEMI is  
11  
12 204 defined as the presence of chest symptoms such as pain or breathlessness suspected to be caused  
13  
14 205 by myocardial ischaemia, persisting for  $\geq 20$  min  $\leq 24$  h before admission; not having ST-segment  
15  
16 206 elevation  $\geq 1$  mm or new left bundle branch block; and the presence of elevated troponin T  $\geq 1.0$   
17  
18 207  $\mu\text{g/L}$  or creatine phosphokinase-MB two times above the upper limit of normal. Unstable angina  
19  
20 208 is defined as the presence of chest pain that may be persistent ( $\geq 20$  min) and at least one of the  
21  
22 209 following: ST depression  $\geq 0.5$  mm or T wave inversion  $\geq 3$  mm; troponin T  $\geq 0.014$   $\mu\text{g/L}$  or  $< 1.0$   
23  
24 210  $\mu\text{g/L}$ ; confirmation of significant stenosis by diagnostic imaging; new decrease in wall motion  
25  
26 211 detected by echocardiography; or reversible myocardial perfusion defect detected by myocardial  
27  
28 212 perfusion imaging.  
29  
30  
31  
32  
33

34 213 The key exclusion criteria are as follows: patients with chest pain and coronary artery  
35  
36 214 diseases presenting with concomitant serious diseases, patients with in-stent thrombosis, patients  
37  
38 215 enrolled in other interventional studies that could affect lipid profile, and those judged as  
39  
40 216 inappropriate by the investigators or subinvestigators.  
41  
42  
43  
44

45 217

#### 47 218 **Primary endpoint**

49  
50 219 The primary endpoint is the incidence of major adverse cardiovascular events (MACE), defined  
51  
52 220 as death associated with myocardial infarction or other cardiovascular death, major non-fatal  
53  
54 221 coronary event (myocardial infarction or hospitalisation for unstable angina), or stroke.  
55  
56  
57  
58  
59  
60



1  
2  
3 222 Incidences are monitored independently by the investigator at each local site. A time window  
4  
5 223 will be allowed for observations at Visit 2 ( $\pm 7$  days) and Visits 3–5 ( $\pm 30$  days).  
6  
7

8 224 Deaths associated with myocardial infarction or other cardiovascular deaths are defined as  
9  
10 225 death secondary to acute myocardial infarction or any death with a clear relationship to  
11  
12 226 underlying coronary heart disease, sudden death, heart failure, complication of coronary  
13  
14 227 revascularisation procedure where the cause of death is clearly related to the procedure,  
15  
16 228 unobserved or unexpected death, or other death that cannot be definitively attributed to a non-  
17  
18 229 cardiovascular cause. Non-fatal myocardial infarction is defined in accordance with the  
19  
20 230 ACC/AHA/ESC Universal Definition of Myocardial Infarction.[29]  
21  
22  
23  
24

25 231 Ischaemic stroke is characterised by an acute episode of focal cerebral, spinal, or retinal  
26  
27 232 dysfunction caused by infarction, defined by at least one of the following: pathological, imaging,  
28  
29 233 or other objective evidence of acute, focal cerebral, spinal, or retinal ischaemic injury in a  
30  
31 234 defined vascular distribution; symptoms of acute cerebral, spinal, or retinal ischaemic injury  
32  
33 235 persisting for  $\geq 24$  hours or until death, with other aetiologies excluded.  
34  
35  
36  
37

38 236

### 39 40 41 237 **Secondary endpoints**

42  
43 238 The secondary endpoints are MACE developed from Visit 1 to Visit 2 (Day 30); MACE  
44  
45 239 developed from Visit 2 (Day 30) to Visit 5 (Day 730); treatment rate by the following lipid-  
46  
47 240 lowering therapies: any statin, intensive statin (e.g., atorvastatin  $\geq 20$  mg, rosuvastatin  $\geq 10$  mg,  
48  
49 241 and pitavastatin  $\geq 4$  mg), PCSK9 inhibitor, and other lipid-lowering therapies such as fibrates and  
50  
51 242 ezetimibe; incidence of events by the addition of the following outcomes to the primary  
52  
53 243 endpoints: coronary revascularisation due to myocardial ischaemia, revascularisation other than  
54  
55  
56  
57  
58  
59  
60

1  
2  
3 244 in the heart, inpatient treatment for occurrence or exacerbation of heart failure, transient  
4  
5 245 ischaemic attack, acute arterial occlusion, central retinal artery occlusion, and other adverse  
6  
7  
8 246 events prolonging or requiring hospitalisation; and proportion of subjects achieving target lipid  
9  
10 247 levels per study visit. The treatment rate will be determined based on written prescriptions. Other  
11  
12 248 endpoints include the prevalence of FH in patients with ACS, comparison of PCSK9  
13  
14 249 concentration between patients with or without FH, and comparison between clinical diagnosis  
15  
16 250 of FH based on the guidelines vs. genetic analysis.  
17  
18  
19

20  
21 251

### 22 23 252 **Discontinuation from study**

24  
25  
26 253 The criteria used to allow discontinuation from the study include the withdrawal of consent by  
27  
28 254 the subject or his/her legal representative, patient ineligibility (violation of the study contract),  
29  
30 255 death of a subject, or removal by the judgement of the investigator or subinvestigators.  
31  
32  
33

34 256

### 35 36 257 **Safety protocol**

37  
38  
39 258 Because this is an observational study (i.e., non-interventional) there will be no adverse events  
40  
41 259 caused by a study drug. Patients will receive drugs as normally prescribed in daily medical  
42  
43 260 practice.  
44  
45

46  
47 261 Serious adverse drug reactions caused by a drug will be the subject for application of relief  
48  
49 262 under the Relief System for Sufferers from Adverse Drug Reactions similar to that in daily  
50  
51 263 medical practice. Treatments for other adverse drug reactions will be covered by the national  
52  
53 264 insurance scheme.  
54  
55

56  
57 265  
58  
59  
60

## 266 **Statistical analyses**

267 The sample size was calculated to assess the persistent cardiovascular risk (defined as MACE)  
268 from the index event to 2 years. Based on the PACIFIC registry, in which the incidence of  
269 MACE was 6.4% at 2 years, a sample size of 2,000 has a precision of  $\pm 1\%$  in the incidence of  
270 MACE with a 95% confidence interval (CI) of 0.053–0.074.[30] With this sample size, the  
271 subgroup analysis (the comparison of MACE in patients with LDL-C  $<1.81$  mmol/L and  $\geq 1.81$   
272 mmol/L) will be performed. Because 409 of 1827 (22.3%) Japanese ACS patients in the  
273 PACIFIC study and 305 of 1145 (26.6%) Japanese ACS patients in an ongoing database study  
274 reached an LDL-C level  $<1.81$  mmol/L, we expect to have 446–532 patients with an LDL-C  
275 level  $<1.81$  mmol/L in this registry. All patients meeting the inclusion criteria will be analysed.  
276 The demographic data will be presented as the mean, median, standard deviation, and range for  
277 continuous data, and number and proportion of subjects in each category for categorical data.

278 The analysis of the primary endpoint will be as follows: for the incidence of MACE at 2  
279 years, Kaplan–Meier analysis will be used to estimate the event observed first after registration  
280 in the whole population. The Greenwood formula will determine the 95% CI.

281 Subgroup analysis will investigate the association of factors with the incidence of MACE,  
282 LDL-C  $<1.81$  mmol/L vs  $\geq 1.81$  mmol/L at registration, and the presence or absence of FH. The  
283 Cox proportional hazard model and subgroup analysis will compare demographic factors (age,  
284 sex, smoking history, body mass index, and underlying diseases) using a two-sided significance  
285 level of 5% (not considering multiplicity, as the study is exploratory). Subgroup analysis will be  
286 performed for LDL-C ( $<1.81$  mmol/L or  $\geq 1.81$  mmol/L) at the time when the event has occurred.

287 Analysis of the secondary endpoints (MACE developed by Visit 2 [Day 30]; MACE  
288 developed between Visit 2 [Day 30] and Visit 5 [Day 730]; and treatment rate by lipid-lowering

1  
2  
3 289 therapy) will be assessed by determining the ratio of subjects on each lipid-lowering therapy  
4  
5 290 administered during observation and the 95% CI using the full analysis set. The incidences of  
6  
7  
8 291 events at Visit 2 and between Visits 2–5 or from the time of registration to the first event, and the  
9  
10 292 associations of factors with each event will be determined by the same procedures as for the  
11  
12 293 primary endpoints. For the other endpoints, the prevalence rate of FH in patients with ACS will  
13  
14  
15 294 be assessed and its 95% CI from the diagnosis of FH will be determined. Logistic regression  
16  
17 295 analysis and subgroup analysis of the background factors that are associated with the prevalence  
18  
19  
20 296 of FH for exploratory investigation will be determined. The summary statistics for the  
21  
22 297 concentration of PCSK9 at each measurement point will be calculated and a trend diagram  
23  
24 298 (median values) will be developed. In addition, the presence or absence of the influence of FH by  
25  
26  
27 299 subgroup analysis will be determined.

28  
29  
30 300 In the survival analysis, missing values will be censored while continuous data and discrete  
31  
32 301 data will be analysed on the basis of measured values without performing any special processing.  
33  
34 302 Furthermore, we will also perform a sensitivity analysis where continuous data are handled using  
35  
36  
37 303 the last observation carried forward imputation, and discrete data are included only in the  
38  
39 304 denominator but not in the numerator. No special processing will be performed for outliers. For  
40  
41 305 the statistical analysis, SAS version 9.4 software (SAS Institute Inc., NC, USA) will be used.  
42  
43

44 306

### 47 307 **Quality assurance measures**

48  
49  
50 308 The study investigators will ensure compliance to the study protocol. Any change in factors that  
51  
52 309 affect the safety of subjects or the scientific quality of this study (study design, endpoints,  
53  
54  
55 310 number of patients, and criteria for registration) will require a revision of the protocol, which  
56  
57 311 must be approved in advance by the ethical review committee. The study records will be stored  
58  
59  
60

1  
2  
3 312 and information made available to auditors, ethical review committees, or regulatory authorities  
4  
5  
6 313 on request.  
7

8  
9 314

## 11 315 **ETHICS AND DISSEMINATION**

14 316 This study is conducted in compliance with the Declaration of Helsinki (amended in October  
15  
16 317 2013) and the Ethical Guidelines for Medical and Health Research Involving Human Subjects  
17  
18 318 (enacted on December 22, 2014). Prior to the study initiation, the investigator or subinvestigators  
19  
20 319 submitted the protocol and informed consent form to the ethical review committee of each study  
21  
22 320 centre and obtained their approval. Patient anonymity will be protected by the use of subject  
23  
24 321 identification codes. A cooperation fee of 5,000 Japanese yen (about \$42 or €37 at Oct 2015) for  
25  
26 322 study participation will be provided for each patient upon request from the study centre. All  
27  
28 323 patients were required to provide written informed consent.  
29  
30  
31  
32

33 324 The results of this study will be presented at major cardiovascular-related congresses. The data  
34  
35 325 regarding FH will be presented at atherosclerotic-related congresses.  
36  
37  
38

39 326

## 41 327 **CONCLUSION**

42  
43  
44 328 The EXPLORE-J study will provide new insights into the relationship between ACS and  
45  
46 329 recurrent events, the relationship between recurrent events and serum LDL-C levels, the FH to  
47  
48 330 ACS ratio, and the PCSK9 concentration in ACS patients in a Japanese population. As a large-  
49  
50 331 scale study including 2,016 patients from 59 centres, this study will be the first ACS registry to  
51  
52 332 seek insight into FH in Japan to target the high-risk population.  
53  
54  
55

56  
57 333  
58  
59  
60

1  
2  
3 334 **Acknowledgements**  
4

5  
6 335 The authors thank Marion Barnett, J. Ludovic Croxford, PhD, and Michelle Belanger, MD, of  
7  
8 336 Edanz Group for providing medical writing support; Tamio Teramoto of Teikyo University  
9  
10 337 (Tokyo, Japan), Shun Ishibashi of Jichi Medical University (Tochigi, Japan), Kotaro Yokote of  
11  
12 338 Chiba University (Chiba, Japan), Tomonori Okamura of Keio University (Tokyo, Japan), and  
13  
14 339 Hiroyuki Daida of Juntendo University (Tokyo, Japan) for collaboration and advice regarding  
15  
16 340 planning of the study; Yosuke Ujike and Yasuyoshi Nakahigashi, of Sanofi (Tokyo, Japan) for  
17  
18 341 providing writing and editing support; Mebix, Inc. (Tokyo, Japan) for assistance with study  
19  
20 342 implementation/operation; BML, Inc. (Tokyo, Japan) for PCSK9- and genome-related analysis;  
21  
22 343 CTD, Inc. (Tokyo, Japan) for consulting; and Shizuya Yamamashita of Rinku General Medical  
23  
24 344 Center (Osaka, Japan), Toru Yoshizumi of Kawasaki Hospital (Hyogo, Japan), Micron, Inc.  
25  
26 345 (Tokyo, Japan) for radiography of the Achilles tendon.  
27  
28  
29  
30  
31  
32  
33  
34

35  
36 347 **Competing interests**  
37

38 348 Kiyoko Uno is an employee of Sanofi. Masato Nakamura, Atsushi Hirayama, Junya Ako, Atsushi  
39  
40 349 Nohara, Hidenori Arai, and Mariko Harada-Shiba have received consultation fees from Sanofi.  
41  
42  
43

44 350

45  
46 351 **Funding**  
47

48  
49 352 This work was supported by Sanofi and Regeneron Pharmaceuticals, Inc.  
50  
51

52 353  
53  
54

55 354 **Authors' contributions**  
56  
57  
58  
59  
60

1  
2  
3 355 M Nakamura, K Uno, A Hirayama, J Ako, A Nohara, H Arai, and M Harada-Shiba all served on  
4  
5  
6 356 the steering committee as principal investigators and equally contributed to conception and  
7  
8 357 design of the study, protocol development, acquisition of data, analysis and interpretation of the  
9  
10 358 data, and drafting and revising the publication for important intellectual content. M Nakamura, K  
11  
12 359 Uno, A Hirayama, J Ako, A Nohara, H Arai, and M Harada-Shiba all approved the final version  
13  
14 360 of the manuscript and have agreed to be accountable for all aspects of the work in ensuring that  
15  
16 361 questions related to the accuracy or integrity of any part of the work are appropriately  
17  
18 362 investigated and resolved.  
19  
20  
21  
22  
23 363  
24  
25  
26 364 **Data sharing statement**  
27  
28 365 No additional unpublished is available.  
29  
30  
31 366  
32  
33  
34  
35  
36  
37  
38  
39  
40  
41  
42  
43  
44  
45  
46  
47  
48  
49  
50  
51  
52  
53  
54  
55  
56  
57  
58  
59  
60

367 **References**

- 368 1 Iso H. Lifestyle and cardiovascular disease in Japan. *J Atheroscler Thromb* 2011;18:83–8.
- 369 2 Gotto AM Jr. Jeremiah Metzger Lecture: cholesterol, inflammation and atherosclerotic  
370 cardiovascular disease: is it all LDL? *Trans Am Clin Climatol Assoc* 2011;122:256–89.
- 371 3 Baigent C, Keech A, Kearney PM, et al. Efficacy and safety of cholesterol-lowering treatment:  
372 prospective meta-analysis of data from 90,056 participants in 14 randomised trials of statins.  
373 *Lancet* 2005;366:1267–78.
- 374 4 Cholesterol Treatment Trialists' (CTT) Collaboration, Baigent C, Blackwell L, et al. Efficacy  
375 and safety of more intensive lowering of LDL Cholesterol: a meta-analysis of data from 170,000  
376 participants in 26 randomised trials. *Lancet* 2010;376:1670–81.
- 377 5 Grundy SM, Cleeman JI, Merz CN, et al. Implications of recent clinical trials for the National  
378 Cholesterol Education Program Adult Treatment Panel III guidelines. *Circulation* 2004;110:227–  
379 39.
- 380 6 European Association for Cardiovascular Prevention and Rehabilitation, Reiner Z, Catapano  
381 AL, et al. ESC/EAS Guidelines for the management of dyslipidaemias: the Task Force for the  
382 management of dyslipidaemias of the European Society of Cardiology (ESC) and the European  
383 Atherosclerosis Society (EAS). *Eur Heart J* 2011;32:1769–818.
- 384 7 Catapano AL, Graham I, De Backer G, et al. 2016 ESC/EAS Guidelines for the Management  
385 of Dyslipidaemias. *Eur Heart J* 2016;37:2999–3058.
- 386 8 O'Keefe JH, Jr., Cordain L, Harris WH, et al. Optimal low-density lipoprotein is 50 to 70  
387 mg/dl: lower is better and physiologically normal. *J Am Coll Cardiol* 2004;43:2142–6.



- 1  
2  
3 388 9 LaRosa JC, Grundy SM, Waters DD, et al. Intensive lipid lowering with atorvastatin in patients  
4  
5  
6 389 with stable coronary disease. *N Engl J Med* 2005;352:1425–35.  
7  
8  
9 390 10 Expert Panel on Detection, Evaluation, and Treatment of High Blood Cholesterol in Adults.  
10  
11 391 Executive Summary of The Third Report of The National Cholesterol Education Program  
12  
13 392 (NCEP) Expert Panel on Detection, Evaluation, And Treatment of High Blood Cholesterol In  
14  
15 393 Adults (Adult Treatment Panel III). *JAMA* 2001;285:2486–97.  
16  
17  
18 394 11 Stone NJ, Robinson JG, Lichtenstein AH, et al. 2013 ACC/AHA Guideline on the Treatment  
19  
20  
21 395 of Blood Cholesterol to Reduce Atherosclerotic Cardiovascular Risk in Adults: A Report of the  
22  
23 396 American College of Cardiology/American Heart Association Task Force on Practice Guidelines.  
24  
25 397 *Circulation* 2014;129:S1–45.  
26  
27  
28 398 12 Teramoto T, Sasaki J, Ishibashi S, et al. Executive summary of the Japan Atherosclerosis  
29  
30  
31 399 Society (JAS) guidelines for the diagnosis and prevention of atherosclerotic cardiovascular  
32  
33 400 diseases in Japan -2012 version. *J Atheroscler Thromb* 2013;20:517–23.  
34  
35  
36 401 13 Okazaki S, Yokoyama T, Miyauchi K, et al. Early statin treatment in patients with acute  
37  
38 402 coronary syndrome: demonstration of the beneficial effect on atherosclerotic lesions by serial  
39  
40  
41 403 volumetric intravascular ultrasound analysis during half a year after coronary event: the  
42  
43 404 ESTABLISH Study. *Circulation* 2004;110:1061–8.  
44  
45  
46 405 14 Dohi T, Miyauchi K, Okazaki S, et al. Early intensive statin treatment for six months  
47  
48 406 improves long-term clinical outcomes in patients with acute coronary syndrome (Extended-  
49  
50 407 ESTABLISH trial): a follow-up study. *Atherosclerosis* 2010;210:497–502.  
51  
52  
53  
54  
55  
56  
57  
58  
59  
60

- 1  
2  
3 408 15 Nakamura H, Arakawa K, Itakura H, et al. Primary prevention of cardiovascular disease with  
4  
5  
6 409 pravastatin in Japan (MEGA Study): a prospective randomised controlled trial. *Lancet*  
7  
8 410 2006;368:1155–63.  
9  
10 411 16 Okazaki S, Yokoyama T, Miyauchi K, et al. Early statin treatment in patients with acute  
11  
12 412 coronary syndrome: demonstration of the beneficial effect on atherosclerotic lesions by serial  
13  
14 413 volumetric intravascular ultrasound analysis during half a year after coronary event: the  
15  
16 414 ESTABLISH Study. *Circulation* 2004;110:1061–8.  
17  
18  
19  
20 415 17 Hiro T, Kimura T, Morimoto T, et al. Effect of intensive statin therapy on regression of  
21  
22 416 coronary atherosclerosis in patients with acute coronary syndrome: a multicenter randomized  
23  
24 417 trial evaluated by volumetric intravascular ultrasound using pitavastatin versus atorvastatin  
25  
26 418 (JAPAN-ACS [Japan assessment of pitavastatin and atorvastatin in acute coronary syndrome]  
27  
28 419 study). *J Am Coll Cardiol* 2009;54:293–302.  
29  
30  
31  
32 420 18 Takayama T, Hiro T, Yamagishi M, et al. Effect of rosuvastatin on coronary atheroma in stable  
33  
34 421 coronary artery disease: multicenter coronary atherosclerosis study measuring effects of  
35  
36 422 rosuvastatin using intravascular ultrasound in Japanese subjects (COSMOS). *Circ J*  
37  
38 423 2009;73:2110–7.  
39  
40  
41  
42 424 19 Nakajima N, Miyauchi K, Yokoyama T, et al. Effect of combination of ezetimibe and a statin  
43  
44 425 on coronary plaque regression in patients with acute coronary syndrome ZEUS trial (eZEtimibe  
45  
46 426 Ultrasound Study). *IJC Metabolic & Endocrine* 2014;3:8–13.  
47  
48  
49  
50 427 20 Tsujita K, Sugiyama S, Sumida H, et al. Impact of Dual Lipid-Lowering Strategy With  
51  
52 428 Ezetimibe and Atorvastatin on Coronary Plaque Regression in Patients With Percutaneous  
53  
54 429 Coronary Intervention: The Multicenter Randomized Controlled PRECISE-IVUS Trial. *J Am*  
55  
56 430 *Coll Cardiol* 2015;66:495–507.  
57  
58  
59  
60

- 1  
2  
3 431 21 Harada-Shiba M, Arai H, Okamura T, et al. Multicenter study to determine the diagnosis  
4  
5  
6 432 criteria of heterozygous familial hypercholesterolemia in Japan. *J Atheroscler Thromb*  
7  
8 433 2012;19:1019–26.  
9  
10  
11 434 22 Nordestgaard BG, Chapman MJ, Humphries SE, et al. Familial hypercholesterolaemia is  
12  
13 435 underdiagnosed and undertreated in the general population: guidance for clinicians to prevent  
14  
15 436 coronary heart disease: consensus statement of the European Atherosclerosis Society. *Eur Heart*  
16  
17 437 *J* 2013;34:3478–90a.  
18  
19  
20 438 23 Risk of fatal coronary heart disease in familial hypercholesterolaemia. Scientific Steering  
21  
22 439 Committee on behalf of the Simon Broome Register Group. *BMJ* 1991;303:893–6.  
23  
24  
25 440 24 Tada N, Yoshida H, Teramoto T, et al. Investigation on risk factors in patients with high LDL  
26  
27 441 cholesterol and HDL cholesterol and treatment on hyperlipidaemia in Japan—Lipid Management  
28  
29 442 Program (LiMAP) in Japan— [in Japanese]. *The Journal of Adult Diseases* 2005;35:1187–97.  
30  
31  
32  
33 443 25 Nanchen D, Gencer B, Muller O, et al. Prognosis of Patients with Familial  
34  
35 444 Hypercholesterolemia After Acute Coronary Syndromes. *Circulation*.  
36  
37 445 2016;pii:CIRCULATIONAHA.116.023007. [Epub ahead of print].  
38  
39  
40  
41 446 26 Roth EM, Diller P. Alirocumab for hyperlipidemia: physiology of PCSK9 inhibition,  
42  
43 447 pharmacodynamics and Phase I and II clinical trial results of a PCSK9 monoclonal antibody.  
44  
45 448 *Future Cardiol* 2014;10:183–99.  
46  
47  
48  
49 449 27 Raal F, Panz V, Immelman A, et al. Elevated PCSK9 levels in untreated patients with  
50  
51 450 heterozygous or homozygous familial hypercholesterolemia and the response to high-dose statin  
52  
53 451 therapy. *J Am Heart Assoc* 2013;2:e000028  
54  
55  
56  
57  
58  
59  
60

- 1  
2  
3 452 28 Guo YL, Zhang W, Li JJ. PCSK9 and lipid lowering drugs. *Clinica Chimica Acta*  
4  
5  
6 453 2014;437:66–71.  
7  
8  
9 454 29 Thygesen K, Alpert JS, Jaffe AS, et al. Third universal definition of myocardial infarction.  
10  
11 455 *Eur Heart J* 2012;33:2551–67.  
12  
13  
14 456 30 Miyauchi K, Morino Y, Tsukahara K, et al. The PACIFIC (Prevention of Atherothrombotic  
15  
16 457 Incidents Following Ischemic Coronary attack) Registry: Rationale and design of a 2-year study  
17  
18 458 in patients initially hospitalised with acute coronary syndrome in Japan. *Cardiovasc Drugs Ther*  
19  
20  
21 459 2010;24:77–83.  
22  
23  
24  
25  
26  
27  
28  
29  
30  
31  
32  
33  
34  
35  
36  
37  
38  
39  
40  
41  
42  
43  
44  
45  
46  
47  
48  
49  
50  
51  
52  
53  
54  
55  
56  
57  
58  
59  
60

1  
2  
3 460 **Figure legends**  
4  
5

6 461 **Figure 1** Study flow and design. <sup>a</sup>For FH gene examination, blood will be collected once from  
7  
8 462 the patients who provide consent, at a visit made after registration. <sup>b</sup>Radiographs of the Achilles  
9  
10 463 tendon will be obtained during hospitalisation for registration as a rule, but a radiography  
11  
12 464 obtained by Visit 3 is acceptable. FH, familial hypercholesterolaemia; PCSK9, proprotein  
13  
14 465 convertase subtilisin kexin 9  
15  
16  
17  
18  
19 466  
20  
21  
22  
23  
24  
25  
26  
27  
28  
29  
30  
31  
32  
33  
34  
35  
36  
37  
38  
39  
40  
41  
42  
43  
44  
45  
46  
47  
48  
49  
50  
51  
52  
53  
54  
55  
56  
57  
58  
59  
60

1  
2  
3  
4  
5  
6  
7  
8  
9  
10  
11  
12  
13  
14  
15  
16  
17  
18  
19  
20  
21  
22  
23  
24  
25  
26  
27  
28  
29  
30  
31  
32  
33  
34  
35  
36  
37  
38  
39  
40  
41  
42  
43  
44  
45  
46  
47  
48  
49  
50  
51  
52  
53  
54  
55  
56  
57  
58  
59  
60

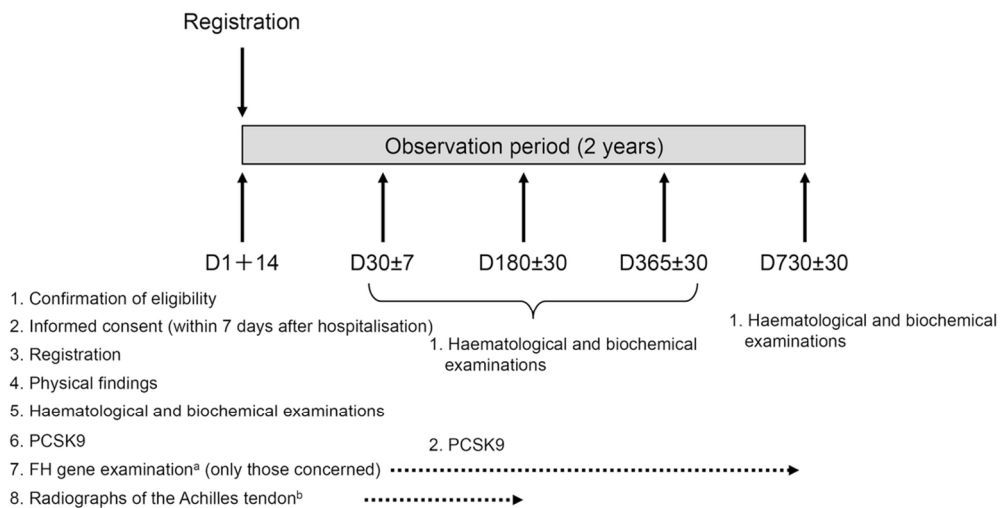

Figure 1

102x52mm (300 x 300 DPI)

review only

1  
2  
3 **Appendix: EXPLORE-J Study Centres**  
4

5 Almeida Memorial Hospital  
6

7  
8 Anjo Kosei Hospital  
9

10  
11 Chiba Emergency Medical Center  
12

13  
14 Chiba University Graduate School of Medicine  
15

16  
17 Fukui Cardiovascular Center  
18

19  
20 Fukuoka Tokushukai Hospital  
21

22  
23 Gifu Heart Center  
24

25  
26 Gifu Prefectural General Medical Center  
27

28  
29 Gunma Prefectural Cardiovascular Center  
30

31  
32 Hakodate Municipal Hospital  
33

34  
35 Higashi Takarazuka Satoh Hospital  
36

37  
38 Higashiyamato Hospital  
39

40  
41 Hiroshima City Hospital  
42

43  
44 Hyogo Brain and Heart Center  
45

46  
47 Iwaki Kyoritsu General Hospital  
48

49  
50 Iwatsuki Minami Hospital  
51

52  
53 Jichi Medical University School of Medicine  
54

55  
56 Juntendo University Graduate School of Medicine  
57

58  
59 Juntendo University Shizuoka Hospital  
60

1  
2  
3 Kanazawa Cardiovascular Hospital  
4  
5

6 Kikuna Memorial Hospital  
7  
8

9 Kishiwada Tokushukai Hospital  
10  
11

12 Kitasato University School of Medicine  
13  
14

15 KKR Takamatsu Hospital  
16  
17

18 Kokura Memorial Hospital  
19  
20

21 Kumamoto University Hospital  
22  
23

24 Kurashiki Central Hospital  
25  
26

27 Kurume University School of Medicine  
28  
29

30 Kyorin University School of Medicine  
31  
32

33 Mitsui Memorial Hospital  
34  
35

36 Nagoya Daini Red Cross Hospital  
37  
38

39 National Cerebral and Cardiovascular Center  
40  
41

42 National Hospital Organization Kure Medical Center and Chugoku Cancer Center  
43  
44

45 Nihon University Itabashi Hospital  
46  
47

48 Nihon University School of Medicine  
49  
50

51 Nippon Medical School  
52  
53

54 Nippon Medical School Musashi-Kosugi Hospital  
55  
56

57 Ome Municipal General Hospital  
58  
59  
60



1  
2  
3 Osaka General Medical Center  
4

5  
6 Rinku General Hospital  
7

8  
9 Saga-Ken Medical Centre Koseikan  
10

11  
12 Saiseikai Fukuoka General Hospital  
13

14  
15 Saiseikai Kumamoto Hospital  
16

17  
18 Sakakibara Heart Institute  
19

20  
21 Sakurabashi Watanabe Hospital  
22

23  
24 Sekishinkai Kawasaki Saiwai Hospital  
25

26  
27 Sendai Kousei Hospital  
28

29  
30 Showa University Northern Yokohama Hospital  
31

32  
33 St. Mary's Hospital  
34

35  
36 Teikyo University School of Medicine  
37

38  
39 The Sakakibara Heart Institute of Okayama  
40

41  
42 Toho University School of Medicine  
43

44  
45 Tokai University School of Medicine  
46

47  
48 Tokorozawa Heart Center  
49

50  
51 Tokushima Prefectural Central Hospital  
52

53  
54 Tokuyama Central Hospital  
55

56  
57 Tokyo Women's Medical University  
58  
59  
60

1  
2  
3  
4  
5  
6  
7  
8  
9  
10  
11  
12  
13  
14  
15  
16  
17  
18  
19  
20  
21  
22  
23  
24  
25  
26  
27  
28  
29  
30  
31  
32  
33  
34  
35  
36  
37  
38  
39  
40  
41  
42  
43  
44  
45  
46  
47  
48  
49  
50  
51  
52  
53  
54  
55  
56  
57  
58  
59  
60

Yokohama City University Medical Center

Yokohama Rosai Hospital

For peer review only
